# Supplementary material for: Time course regulatory analysis based on paired expression and chromatin accessibility data
Source: HighWire-hosted journal article supplement (doi:10.1101/gr.257063.119), 2020-03-18
Supplement: Supplementary_Table_1.xlsx [file Supplementary_Table_1.xlsx]

## Sheet: List of external public data 
List of external public data
ID	Cell type/tissue	Expression ID	Accessibility ID
1	G1E	ENCSR000CHV	ENCSR000CHP
2	G1E	ENCSR000CIG	ENCSR000CHP
3	G1E	ENCSR826IXR	ENCSR000CHP
4	G1E-ER4	ENCSR000CHW	ENCSR000CHQ
5	G1E-ER4	ENCSR000CHX	ENCSR000CHQ
6	G1E-ER4	ENCSR000CHY	ENCSR000CHQ
7	G1E-ER4	ENCSR000CHZ	ENCSR000CHQ
8	G1E-ER4	ENCSR000CIA	ENCSR000CHQ
9	G1E-ER4	ENCSR000CIB	ENCSR000CHQ
10	G1E-ER4	ENCSR000CIH	ENCSR000CHQ
11	G1E-ER4	ENCSR181KQJ	ENCSR000CHQ
12	416B	ENCSR000CLU	ENCSR000CMK
13	A20	ENCSR000CLV	ENCSR000CML
14	B-cell_(CD19+)	ENCSR000CLY	ENCSR000CMM
15	B-cell_(CD43-)	ENCSR000CLZ	ENCSR000CMN
16	Cerebellum	ENCSR000CGX	ENCSR000CMO
17	Cerebellum	ENCSR000CLI	ENCSR000CMO
18	Cerebrum	ENCSR000CLJ	ENCSR000CMP
19	CH12	ENCSR000AJV	ENCSR000CMQ
20	CH12	ENCSR000CHR	ENCSR000CMQ
21	CH12	ENCSR000CWD	ENCSR000CMQ
22	ES-E14	ENCSR000CWC	ENCSR000CMW
23	FatPad	ENCSR000CLK	ENCSR000CMZ
24	GenitalFatPad	ENCSR000CMA	ENCSR000CNC
25	HeadlessEmbryo	ENCSR000CLL	ENCSR000CND
26	Heart	ENCSR000CGZ	ENCSR000CNE
27	Heart	ENCSR000CMB	ENCSR000CNE
28	Kidney	ENCSR000CHA	ENCSR000CNG
29	Kidney	ENCSR000CLM	ENCSR000CNG
30	LgIntestine	ENCSR000CMC	ENCSR000CNH
31	Liver	ENCSR000CHB	ENCSR000CNI
32	Liver	ENCSR000CLO	ENCSR000CNI
33	Liver	ENCSR000CLN	ENCSR000CNJ
34	Liver	ENCSR000CMI	ENCSR000CNJ
35	Liver	ENCSR000CLN	ENCSR000CNK
36	Liver	ENCSR000CMI	ENCSR000CNK
37	Liver	ENCSR000CLN	ENCSR000CNL
38	Liver	ENCSR000CMI	ENCSR000CNL
39	Lung	ENCSR000CHC	ENCSR000CNM
40	Lung	ENCSR000CMD	ENCSR000CNM
41	MEL	ENCSR000CHM	ENCSR000CNN
42	MEL	ENCSR000CID	ENCSR000CNN
43	MEL	ENCSR000CIE	ENCSR000CNN
44	MEL	ENCSR000CLP	ENCSR000CNN
45	MEL	ENCSR000CWE	ENCSR000CNN
46	MEL	ENCSR000CWF	ENCSR000CNN
47	NIH-3T3	ENCSR000CLW	ENCSR000CNS
48	Patski	ENCSR000CLX	ENCSR000CNT
49	Muscle	ENCSR000CME	ENCSR000CNX
50	Spleen	ENCSR000CGW	ENCSR000CNY
51	Spleen	ENCSR000CMF	ENCSR000CNY
52	T-Naive	ENCSR000CMG	ENCSR000CNZ
53	Thymus	ENCSR000CHK	ENCSR000COB
54	Thymus	ENCSR000CMH	ENCSR000COB
55	WholeBrain	ENCSR000CLR	ENCSR000COE
56	WholeBrain	ENCSR000CLT	ENCSR000COG
