# Supplementary material for: Time course regulatory analysis based on paired expression and chromatin accessibility data
Source: HighWire-hosted journal article supplement (doi:10.1101/gr.257063.119), 2020-03-18
Supplement: Supplementary_Table_2.xlsx [file Supplementary_Table_2.xlsx]

## Sheet: List of novel enhancers
List of novel enhancers
Chromosome	Start	End	Name
chr1	3002578	3002866	chr1_3002578_3002866
chr1	3034750	3035980	chr1_3034750_3035980
chr1	3036135	3037192	chr1_3036135_3037192
chr1	3052564	3053370	chr1_3052564_3053370
chr1	3061756	3063075	chr1_3061756_3063075
chr1	3239952	3240155	chr1_3239952_3240155
chr1	3260448	3260717	chr1_3260448_3260717
chr1	3315471	3315682	chr1_3315471_3315682
chr1	3333259	3334519	chr1_3333259_3334519
chr1	3358421	3358594	chr1_3358421_3358594
chr1	3385764	3386032	chr1_3385764_3386032
chr1	3435684	3436445	chr1_3435684_3436445
chr1	3502871	3503369	chr1_3502871_3503369
chr1	3539070	3540240	chr1_3539070_3540240
chr1	3546710	3547119	chr1_3546710_3547119
chr1	3559233	3560229	chr1_3559233_3560229
chr1	3601333	3601544	chr1_3601333_3601544
chr1	3630928	3631087	chr1_3630928_3631087
chr1	3639168	3639402	chr1_3639168_3639402
chr1	3671377	3672066	chr1_3671377_3672066
chr1	3831929	3832665	chr1_3831929_3832665
chr1	3842562	3843160	chr1_3842562_3843160
chr1	3856720	3856880	chr1_3856720_3856880
chr1	3902724	3903258	chr1_3902724_3903258
chr1	3905600	3905857	chr1_3905600_3905857
chr1	3924388	3924864	chr1_3924388_3924864
chr1	3943403	3944329	chr1_3943403_3944329
chr1	3984526	3985144	chr1_3984526_3985144
chr1	3991781	3992030	chr1_3991781_3992030
chr1	4019325	4019550	chr1_4019325_4019550
chr1	4051108	4051381	chr1_4051108_4051381
chr1	4083488	4083667	chr1_4083488_4083667
chr1	4088208	4088370	chr1_4088208_4088370
chr1	4091110	4091319	chr1_4091110_4091319
chr1	4126628	4127228	chr1_4126628_4127228
chr1	4132472	4132989	chr1_4132472_4132989
chr1	4140568	4141637	chr1_4140568_4141637
chr1	4204071	4204522	chr1_4204071_4204522
chr1	4216211	4216453	chr1_4216211_4216453
chr1	4218338	4219006	chr1_4218338_4219006
chr1	4245893	4246518	chr1_4245893_4246518
chr1	4287244	4287421	chr1_4287244_4287421
chr1	4316682	4317753	chr1_4316682_4317753
chr1	4322350	4322830	chr1_4322350_4322830
chr1	4333622	4333830	chr1_4333622_4333830
chr1	4335413	4335687	chr1_4335413_4335687
chr1	4336056	4336510	chr1_4336056_4336510
chr1	4384762	4385177	chr1_4384762_4385177
chr1	4386627	4387175	chr1_4386627_4387175
chr1	4406567	4407597	chr1_4406567_4407597
chr1	4424781	4425411	chr1_4424781_4425411
chr1	4438022	4438431	chr1_4438022_4438431
chr1	4463463	4465117	chr1_4463463_4465117
chr1	4471388	4472238	chr1_4471388_4472238
chr1	4478084	4478364	chr1_4478084_4478364
chr1	4481766	4483904	chr1_4481766_4483904
chr1	4506812	4507006	chr1_4506812_4507006
chr1	4510204	4511837	chr1_4510204_4511837
chr1	4521701	4521995	chr1_4521701_4521995
chr1	4527428	4529092	chr1_4527428_4529092
chr1	4557573	4558069	chr1_4557573_4558069
chr1	4590070	4590297	chr1_4590070_4590297
chr1	4598823	4599238	chr1_4598823_4599238
chr1	4664476	4664933	chr1_4664476_4664933
chr1	4687023	4687156	chr1_4687023_4687156
chr1	4714694	4715568	chr1_4714694_4715568
chr1	4788565	4788739	chr1_4788565_4788739
chr1	4804065	4804230	chr1_4804065_4804230
chr1	4815818	4816630	chr1_4815818_4816630
chr1	4824271	4824605	chr1_4824271_4824605
chr1	4841827	4842311	chr1_4841827_4842311
chr1	4870773	4871246	chr1_4870773_4871246
chr1	4911755	4912188	chr1_4911755_4912188
chr1	4931477	4932039	chr1_4931477_4932039
chr1	4937265	4937638	chr1_4937265_4937638
chr1	4961681	4962851	chr1_4961681_4962851
chr1	4966329	4966866	chr1_4966329_4966866
chr1	5036568	5036906	chr1_5036568_5036906
chr1	5098709	5098946	chr1_5098709_5098946
chr1	5127034	5127364	chr1_5127034_5127364
chr1	5133604	5133861	chr1_5133604_5133861
chr1	5154006	5154311	chr1_5154006_5154311
chr1	5164209	5165029	chr1_5164209_5165029
chr1	5173533	5174030	chr1_5173533_5174030
chr1	5178986	5179510	chr1_5178986_5179510
chr1	5207608	5207749	chr1_5207608_5207749
chr1	5210135	5210295	chr1_5210135_5210295
chr1	5210873	5211041	chr1_5210873_5211041
chr1	5273333	5273605	chr1_5273333_5273605
chr1	5273766	5274158	chr1_5273766_5274158
chr1	5286890	5287554	chr1_5286890_5287554
chr1	5302980	5303190	chr1_5302980_5303190
chr1	5386496	5387133	chr1_5386496_5387133
chr1	5451471	5452353	chr1_5451471_5452353
chr1	5482090	5482352	chr1_5482090_5482352
chr1	5772217	5773258	chr1_5772217_5773258
chr1	5806975	5807362	chr1_5806975_5807362
chr1	5933738	5933995	chr1_5933738_5933995
chr1	5971962	5972736	chr1_5971962_5972736
chr1	5982651	5983193	chr1_5982651_5983193
chr1	6030256	6030784	chr1_6030256_6030784
chr1	6048871	6049695	chr1_6048871_6049695
chr1	6051419	6052060	chr1_6051419_6052060
chr1	6066779	6067242	chr1_6066779_6067242
chr1	6079939	6080376	chr1_6079939_6080376
chr1	6081768	6082597	chr1_6081768_6082597
chr1	6092979	6093263	chr1_6092979_6093263
chr1	6107602	6108154	chr1_6107602_6108154
chr1	6124718	6125889	chr1_6124718_6125889
chr1	6142500	6142900	chr1_6142500_6142900
chr1	6180592	6181286	chr1_6180592_6181286
chr1	6236151	6236439	chr1_6236151_6236439
chr1	6267477	6267676	chr1_6267477_6267676
chr1	6391525	6392019	chr1_6391525_6392019
chr1	6408198	6408505	chr1_6408198_6408505
chr1	6447936	6448837	chr1_6447936_6448837
chr1	6574628	6575032	chr1_6574628_6575032
chr1	6647982	6648872	chr1_6647982_6648872
chr1	6719352	6720230	chr1_6719352_6720230
chr1	6723768	6725351	chr1_6723768_6725351
chr1	6742393	6742684	chr1_6742393_6742684
chr1	6860317	6860776	chr1_6860317_6860776
chr1	6888361	6888754	chr1_6888361_6888754
chr1	6889103	6889663	chr1_6889103_6889663
chr1	6905878	6906068	chr1_6905878_6906068
chr1	6929904	6930974	chr1_6929904_6930974
chr1	6932035	6932513	chr1_6932035_6932513
chr1	6949675	6949881	chr1_6949675_6949881
chr1	6950127	6950582	chr1_6950127_6950582
chr1	6963811	6964242	chr1_6963811_6964242
chr1	6974340	6975146	chr1_6974340_6975146
chr1	6987837	6988783	chr1_6987837_6988783
chr1	7035236	7035623	chr1_7035236_7035623
chr1	7037235	7037676	chr1_7037235_7037676
chr1	7043738	7043959	chr1_7043738_7043959
chr1	7046053	7046210	chr1_7046053_7046210
chr1	7058647	7059145	chr1_7058647_7059145
chr1	7059504	7059766	chr1_7059504_7059766
chr1	7114508	7116346	chr1_7114508_7116346
chr1	7119364	7120595	chr1_7119364_7120595
chr1	7127064	7127442	chr1_7127064_7127442
chr1	7142481	7143271	chr1_7142481_7143271
chr1	7164973	7165137	chr1_7164973_7165137
chr1	7165324	7165491	chr1_7165324_7165491
chr1	7256309	7256464	chr1_7256309_7256464
chr1	7261519	7262273	chr1_7261519_7262273
chr1	7288265	7288528	chr1_7288265_7288528
chr1	7288829	7289735	chr1_7288829_7289735
chr1	7303585	7303850	chr1_7303585_7303850
chr1	7351324	7351576	chr1_7351324_7351576
chr1	7441825	7442401	chr1_7441825_7442401
chr1	7455212	7455473	chr1_7455212_7455473
chr1	7478660	7478806	chr1_7478660_7478806
chr1	7484238	7484533	chr1_7484238_7484533
chr1	7492381	7493116	chr1_7492381_7493116
chr1	7515996	7516160	chr1_7515996_7516160
chr1	7519890	7520159	chr1_7519890_7520159
chr1	7549091	7549565	chr1_7549091_7549565
chr1	7668852	7669050	chr1_7668852_7669050
chr1	7722657	7723160	chr1_7722657_7723160
chr1	7731965	7732542	chr1_7731965_7732542
chr1	7759779	7760075	chr1_7759779_7760075
chr1	7766816	7768744	chr1_7766816_7768744
chr1	7768784	7768987	chr1_7768784_7768987
chr1	7958056	7958353	chr1_7958056_7958353
chr1	8086449	8087490	chr1_8086449_8087490
chr1	8113300	8113492	chr1_8113300_8113492
chr1	8425841	8426359	chr1_8425841_8426359
chr1	8458706	8459108	chr1_8458706_8459108
chr1	8460412	8460870	chr1_8460412_8460870
chr1	8466972	8467635	chr1_8466972_8467635
chr1	8486421	8486692	chr1_8486421_8486692
chr1	8523510	8524584	chr1_8523510_8524584
chr1	8524878	8525428	chr1_8524878_8525428
chr1	8525561	8527242	chr1_8525561_8527242
chr1	8547864	8548789	chr1_8547864_8548789
chr1	8571431	8572836	chr1_8571431_8572836
chr1	8643713	8643951	chr1_8643713_8643951
chr1	8673095	8673764	chr1_8673095_8673764
chr1	8750317	8750582	chr1_8750317_8750582
chr1	8765716	8766132	chr1_8765716_8766132
chr1	8903694	8904205	chr1_8903694_8904205
chr1	8925988	8926312	chr1_8925988_8926312
chr1	8926621	8927052	chr1_8926621_8927052
chr1	8930946	8931766	chr1_8930946_8931766
chr1	8936820	8937186	chr1_8936820_8937186
chr1	8938070	8938531	chr1_8938070_8938531
chr1	9323513	9323723	chr1_9323513_9323723
chr1	9348737	9348932	chr1_9348737_9348932
chr1	9357234	9357467	chr1_9357234_9357467
chr1	9369899	9370138	chr1_9369899_9370138
chr1	9439072	9439388	chr1_9439072_9439388
chr1	9496646	9497008	chr1_9496646_9497008
chr1	9505610	9505818	chr1_9505610_9505818
chr1	9531439	9531612	chr1_9531439_9531612
chr1	9560255	9560513	chr1_9560255_9560513
chr1	9751179	9751573	chr1_9751179_9751573
chr1	9837816	9839074	chr1_9837816_9839074
chr1	9840404	9840836	chr1_9840404_9840836
chr1	9862148	9862310	chr1_9862148_9862310
chr1	9892916	9893073	chr1_9892916_9893073
chr1	9927409	9928164	chr1_9927409_9928164
chr1	9975979	9976275	chr1_9975979_9976275
chr1	9997271	9997603	chr1_9997271_9997603
chr1	10038850	10040058	chr1_10038850_10040058
chr1	10089787	10089946	chr1_10089787_10089946
chr1	10120694	10120927	chr1_10120694_10120927
chr1	10148325	10148754	chr1_10148325_10148754
chr1	10327831	10328146	chr1_10327831_10328146
chr1	10367939	10368528	chr1_10367939_10368528
chr1	10371051	10371649	chr1_10371051_10371649
chr1	10385464	10386259	chr1_10385464_10386259
chr1	10386441	10386702	chr1_10386441_10386702
chr1	10386879	10387368	chr1_10386879_10387368
chr1	10388077	10388219	chr1_10388077_10388219
chr1	10447859	10448358	chr1_10447859_10448358
chr1	10478037	10478705	chr1_10478037_10478705
chr1	10498364	10498570	chr1_10498364_10498570
chr1	10569559	10569796	chr1_10569559_10569796
chr1	10569896	10570041	chr1_10569896_10570041
chr1	10571729	10572020	chr1_10571729_10572020
chr1	10578788	10579409	chr1_10578788_10579409
chr1	10593525	10593778	chr1_10593525_10593778
chr1	10621108	10621304	chr1_10621108_10621304
chr1	10623728	10623940	chr1_10623728_10623940
chr1	10626416	10626902	chr1_10626416_10626902
chr1	10634649	10635166	chr1_10634649_10635166
chr1	10640565	10641316	chr1_10640565_10641316
chr1	10646272	10646982	chr1_10646272_10646982
chr1	10689747	10690464	chr1_10689747_10690464
chr1	10709473	10710026	chr1_10709473_10710026
chr1	10713345	10714014	chr1_10713345_10714014
chr1	10747331	10747552	chr1_10747331_10747552
chr1	10749588	10750241	chr1_10749588_10750241
chr1	10795002	10795397	chr1_10795002_10795397
chr1	10825715	10826563	chr1_10825715_10826563
chr1	10844515	10844909	chr1_10844515_10844909
chr1	10861493	10861710	chr1_10861493_10861710
chr1	10887199	10887819	chr1_10887199_10887819
chr1	10892578	10893308	chr1_10892578_10893308
chr1	10935605	10935822	chr1_10935605_10935822
chr1	10992690	10992846	chr1_10992690_10992846
chr1	11055384	11055686	chr1_11055384_11055686
chr1	11072219	11072553	chr1_11072219_11072553
chr1	11077659	11077838	chr1_11077659_11077838
chr1	11085486	11085747	chr1_11085486_11085747
chr1	11134623	11135051	chr1_11134623_11135051
chr1	11141524	11142080	chr1_11141524_11142080
chr1	11148723	11148965	chr1_11148723_11148965
chr1	11243642	11244316	chr1_11243642_11244316
chr1	11263662	11263888	chr1_11263662_11263888
chr1	11264165	11264486	chr1_11264165_11264486
chr1	11267403	11268669	chr1_11267403_11268669
chr1	11272715	11273278	chr1_11272715_11273278
chr1	11312732	11313342	chr1_11312732_11313342
chr1	11338308	11338859	chr1_11338308_11338859
chr1	11339159	11339588	chr1_11339159_11339588
chr1	11376071	11376262	chr1_11376071_11376262
chr1	11385339	11386644	chr1_11385339_11386644
chr1	11396474	11396820	chr1_11396474_11396820
chr1	11433962	11434346	chr1_11433962_11434346
chr1	11456597	11457484	chr1_11456597_11457484
chr1	11511670	11512090	chr1_11511670_11512090
chr1	11732017	11732418	chr1_11732017_11732418
chr1	11737188	11737598	chr1_11737188_11737598
chr1	11784002	11784160	chr1_11784002_11784160
chr1	11854052	11854785	chr1_11854052_11854785
chr1	11986374	11986736	chr1_11986374_11986736
chr1	11990627	11991021	chr1_11990627_11991021
chr1	12015711	12016337	chr1_12015711_12016337
chr1	12045928	12046310	chr1_12045928_12046310
chr1	12082919	12083282	chr1_12082919_12083282
chr1	12116538	12117225	chr1_12116538_12117225
chr1	12137987	12138152	chr1_12137987_12138152
chr1	12142357	12142517	chr1_12142357_12142517
chr1	12277903	12278279	chr1_12277903_12278279
chr1	12400100	12400785	chr1_12400100_12400785
chr1	12557502	12557685	chr1_12557502_12557685
chr1	12562130	12562298	chr1_12562130_12562298
chr1	12562926	12563329	chr1_12562926_12563329
chr1	12564191	12564941	chr1_12564191_12564941
chr1	12566478	12566626	chr1_12566478_12566626
chr1	12566956	12567624	chr1_12566956_12567624
chr1	12572976	12573656	chr1_12572976_12573656
chr1	12606729	12606975	chr1_12606729_12606975
chr1	12661967	12662145	chr1_12661967_12662145
chr1	12679578	12679871	chr1_12679578_12679871
chr1	12682940	12683527	chr1_12682940_12683527
chr1	12691846	12692481	chr1_12691846_12692481
chr1	12708040	12709175	chr1_12708040_12709175
chr1	12714725	12714949	chr1_12714725_12714949
chr1	12724281	12724707	chr1_12724281_12724707
chr1	12741492	12741676	chr1_12741492_12741676
chr1	12798048	12798365	chr1_12798048_12798365
chr1	12837730	12837996	chr1_12837730_12837996
chr1	12838213	12838400	chr1_12838213_12838400
chr1	12852703	12852902	chr1_12852703_12852902
chr1	12867384	12867913	chr1_12867384_12867913
chr1	12946226	12946360	chr1_12946226_12946360
chr1	12953954	12954131	chr1_12953954_12954131
chr1	12994768	12996142	chr1_12994768_12996142
chr1	13001054	13001273	chr1_13001054_13001273
chr1	13028763	13029134	chr1_13028763_13029134
chr1	13068148	13068616	chr1_13068148_13068616
chr1	13071237	13071707	chr1_13071237_13071707
chr1	13071958	13072244	chr1_13071958_13072244
chr1	13084419	13086215	chr1_13084419_13086215
chr1	13098739	13098932	chr1_13098739_13098932
chr1	13110730	13110927	chr1_13110730_13110927
chr1	13115564	13116093	chr1_13115564_13116093
chr1	13132604	13132816	chr1_13132604_13132816
chr1	13132954	13133197	chr1_13132954_13133197
chr1	13339487	13339652	chr1_13339487_13339652
chr1	13380198	13380522	chr1_13380198_13380522
chr1	13395530	13395737	chr1_13395530_13395737
chr1	13406457	13406772	chr1_13406457_13406772
chr1	13413808	13414032	chr1_13413808_13414032
chr1	13425036	13425225	chr1_13425036_13425225
chr1	13446963	13447827	chr1_13446963_13447827
chr1	13457544	13458916	chr1_13457544_13458916
chr1	13605814	13606412	chr1_13605814_13606412
chr1	13609651	13609822	chr1_13609651_13609822
chr1	13613903	13614067	chr1_13613903_13614067
chr1	13731151	13731282	chr1_13731151_13731282
chr1	13731361	13731517	chr1_13731361_13731517
chr1	13785338	13785693	chr1_13785338_13785693
chr1	13790664	13790802	chr1_13790664_13790802
chr1	13834404	13834676	chr1_13834404_13834676
chr1	13841102	13841395	chr1_13841102_13841395
chr1	13851301	13851571	chr1_13851301_13851571
chr1	13921196	13921541	chr1_13921196_13921541
chr1	13980518	13980706	chr1_13980518_13980706
chr1	14027465	14027689	chr1_14027465_14027689
chr1	14043086	14043261	chr1_14043086_14043261
chr1	14085646	14085851	chr1_14085646_14085851
chr1	14088001	14088295	chr1_14088001_14088295
chr1	14127776	14128044	chr1_14127776_14128044
chr1	14155187	14156829	chr1_14155187_14156829
chr1	14170411	14170645	chr1_14170411_14170645
chr1	14176133	14177366	chr1_14176133_14177366
chr1	14247486	14247655	chr1_14247486_14247655
chr1	14263853	14264203	chr1_14263853_14264203
chr1	14265957	14266228	chr1_14265957_14266228
chr1	14266460	14266705	chr1_14266460_14266705
chr1	14275991	14276211	chr1_14275991_14276211
chr1	14338587	14339177	chr1_14338587_14339177
chr1	14347130	14347293	chr1_14347130_14347293
chr1	14464105	14464242	chr1_14464105_14464242
chr1	14475747	14475912	chr1_14475747_14475912
chr1	14574712	14575346	chr1_14574712_14575346
chr1	14599243	14600445	chr1_14599243_14600445
chr1	14625819	14626558	chr1_14625819_14626558
chr1	14640162	14641294	chr1_14640162_14641294
chr1	14652877	14653293	chr1_14652877_14653293
chr1	14662663	14662914	chr1_14662663_14662914
chr1	14676203	14676498	chr1_14676203_14676498
chr1	14677334	14677540	chr1_14677334_14677540
chr1	14678208	14678694	chr1_14678208_14678694
chr1	14681945	14682153	chr1_14681945_14682153
chr1	14831847	14832021	chr1_14831847_14832021
chr1	14832625	14833111	chr1_14832625_14833111
chr1	14888435	14888696	chr1_14888435_14888696
chr1	14970360	14970715	chr1_14970360_14970715
chr1	15007606	15008538	chr1_15007606_15008538
chr1	15101305	15102137	chr1_15101305_15102137
chr1	15118904	15119144	chr1_15118904_15119144
chr1	15192434	15193189	chr1_15192434_15193189
chr1	15209463	15209835	chr1_15209463_15209835
chr1	15317413	15317666	chr1_15317413_15317666
chr1	15352002	15352192	chr1_15352002_15352192
chr1	15405965	15406190	chr1_15405965_15406190
chr1	15420367	15421397	chr1_15420367_15421397
chr1	15553958	15554463	chr1_15553958_15554463
chr1	15611912	15612436	chr1_15611912_15612436
chr1	15620669	15620857	chr1_15620669_15620857
chr1	15622142	15622291	chr1_15622142_15622291
chr1	15627385	15628662	chr1_15627385_15628662
chr1	15639936	15640154	chr1_15639936_15640154
chr1	15653834	15654417	chr1_15653834_15654417
chr1	15673475	15673979	chr1_15673475_15673979
chr1	15684775	15685015	chr1_15684775_15685015
chr1	15709566	15709928	chr1_15709566_15709928
chr1	15784310	15784945	chr1_15784310_15784945
chr1	15786607	15786762	chr1_15786607_15786762
chr1	15837845	15838632	chr1_15837845_15838632
chr1	15864982	15865274	chr1_15864982_15865274
chr1	15903180	15903894	chr1_15903180_15903894
chr1	15909231	15910528	chr1_15909231_15910528
chr1	15915347	15916699	chr1_15915347_15916699
chr1	15953986	15954242	chr1_15953986_15954242
chr1	15958371	15959275	chr1_15958371_15959275
chr1	15969104	15969274	chr1_15969104_15969274
chr1	15969292	15969859	chr1_15969292_15969859
chr1	15982810	15984367	chr1_15982810_15984367
chr1	15988508	15988687	chr1_15988508_15988687
chr1	15993313	15993533	chr1_15993313_15993533
chr1	16035371	16035851	chr1_16035371_16035851
chr1	16048849	16049080	chr1_16048849_16049080
chr1	16051977	16052629	chr1_16051977_16052629
chr1	16077868	16078415	chr1_16077868_16078415
chr1	16117690	16118614	chr1_16117690_16118614
chr1	16141409	16141635	chr1_16141409_16141635
chr1	16159833	16160782	chr1_16159833_16160782
chr1	16219644	16220094	chr1_16219644_16220094
chr1	16232799	16233059	chr1_16232799_16233059
chr1	16245895	16246229	chr1_16245895_16246229
chr1	16264766	16264931	chr1_16264766_16264931
chr1	16269690	16269972	chr1_16269690_16269972
chr1	16328001	16328163	chr1_16328001_16328163
chr1	16361932	16362728	chr1_16361932_16362728
chr1	16384654	16384908	chr1_16384654_16384908
chr1	16430001	16430731	chr1_16430001_16430731
chr1	16481416	16481750	chr1_16481416_16481750
chr1	16567849	16568206	chr1_16567849_16568206
chr1	16590508	16591101	chr1_16590508_16591101
chr1	16621527	16621826	chr1_16621527_16621826
chr1	16621842	16622043	chr1_16621842_16622043
chr1	16782749	16783412	chr1_16782749_16783412
chr1	16814177	16815581	chr1_16814177_16815581
chr1	16857146	16857937	chr1_16857146_16857937
chr1	16858415	16858780	chr1_16858415_16858780
chr1	16879599	16880548	chr1_16879599_16880548
chr1	16986858	16987006	chr1_16986858_16987006
chr1	17136191	17136526	chr1_17136191_17136526
chr1	17229945	17230945	chr1_17229945_17230945
chr1	17234010	17234850	chr1_17234010_17234850
chr1	17249852	17250641	chr1_17249852_17250641
chr1	17297782	17297941	chr1_17297782_17297941
chr1	17299903	17300400	chr1_17299903_17300400
chr1	17424014	17424239	chr1_17424014_17424239
chr1	17424715	17424924	chr1_17424715_17424924
chr1	17473036	17473352	chr1_17473036_17473352
chr1	17501755	17502032	chr1_17501755_17502032
chr1	17521007	17521926	chr1_17521007_17521926
chr1	17530453	17530704	chr1_17530453_17530704
chr1	17660102	17660327	chr1_17660102_17660327
chr1	17676972	17677360	chr1_17676972_17677360
chr1	17827311	17827746	chr1_17827311_17827746
chr1	17828577	17828917	chr1_17828577_17828917
chr1	17836575	17836797	chr1_17836575_17836797
chr1	17934822	17934977	chr1_17934822_17934977
chr1	17968007	17968492	chr1_17968007_17968492
chr1	17970705	17971303	chr1_17970705_17971303
chr1	18003073	18003350	chr1_18003073_18003350
chr1	18005694	18006930	chr1_18005694_18006930
chr1	18033357	18033578	chr1_18033357_18033578
chr1	18097790	18097969	chr1_18097790_18097969
chr1	18163856	18164183	chr1_18163856_18164183
chr1	18218828	18219730	chr1_18218828_18219730
chr1	18221143	18221304	chr1_18221143_18221304
chr1	18235484	18236850	chr1_18235484_18236850
chr1	18258553	18260142	chr1_18258553_18260142
chr1	18277446	18277950	chr1_18277446_18277950
chr1	18279103	18279258	chr1_18279103_18279258
chr1	18298081	18298456	chr1_18298081_18298456
chr1	18314578	18315341	chr1_18314578_18315341
chr1	18328967	18329222	chr1_18328967_18329222
chr1	18350216	18350604	chr1_18350216_18350604
chr1	18402983	18403429	chr1_18402983_18403429
chr1	18523086	18523598	chr1_18523086_18523598
chr1	18525826	18526047	chr1_18525826_18526047
chr1	18590155	18590454	chr1_18590155_18590454
chr1	18648828	18649230	chr1_18648828_18649230
chr1	18783675	18783997	chr1_18783675_18783997
chr1	18821162	18821690	chr1_18821162_18821690
chr1	18946113	18946752	chr1_18946113_18946752
chr1	18966841	18967271	chr1_18966841_18967271
chr1	19046201	19046647	chr1_19046201_19046647
chr1	19093628	19094998	chr1_19093628_19094998
chr1	19163638	19163779	chr1_19163638_19163779
chr1	19182722	19182976	chr1_19182722_19182976
chr1	19199095	19201011	chr1_19199095_19201011
chr1	19202267	19202565	chr1_19202267_19202565
chr1	19211847	19212059	chr1_19211847_19212059
chr1	19236433	19236732	chr1_19236433_19236732
chr1	19279287	19279530	chr1_19279287_19279530
chr1	19280083	19280639	chr1_19280083_19280639
chr1	19324228	19324364	chr1_19324228_19324364
chr1	19334611	19335604	chr1_19334611_19335604
chr1	19338383	19338527	chr1_19338383_19338527
chr1	19355527	19355727	chr1_19355527_19355727
chr1	19402222	19402874	chr1_19402222_19402874
chr1	19431720	19432139	chr1_19431720_19432139
chr1	19440084	19440502	chr1_19440084_19440502
chr1	19626246	19626957	chr1_19626246_19626957
chr1	19649212	19649385	chr1_19649212_19649385
chr1	19663679	19664012	chr1_19663679_19664012
chr1	19664471	19664925	chr1_19664471_19664925
chr1	19670857	19671736	chr1_19670857_19671736
chr1	19789348	19789667	chr1_19789348_19789667
chr1	19839914	19840503	chr1_19839914_19840503
chr1	19858264	19859061	chr1_19858264_19859061
chr1	19871268	19871860	chr1_19871268_19871860
chr1	19890843	19892078	chr1_19890843_19892078
chr1	19917067	19918566	chr1_19917067_19918566
chr1	19946746	19947537	chr1_19946746_19947537
chr1	19965654	19965992	chr1_19965654_19965992
chr1	19971396	19971947	chr1_19971396_19971947
chr1	19989233	19990282	chr1_19989233_19990282
chr1	20008298	20008719	chr1_20008298_20008719
chr1	20085164	20085348	chr1_20085164_20085348
chr1	20096667	20097490	chr1_20096667_20097490
chr1	20166506	20166811	chr1_20166506_20166811
chr1	20170173	20171007	chr1_20170173_20171007
chr1	20195002	20195160	chr1_20195002_20195160
chr1	20214379	20214878	chr1_20214379_20214878
chr1	20239021	20239188	chr1_20239021_20239188
chr1	20334550	20335192	chr1_20334550_20335192
chr1	20342016	20342241	chr1_20342016_20342241
chr1	20388196	20388385	chr1_20388196_20388385
chr1	20421759	20423140	chr1_20421759_20423140
chr1	20460795	20461296	chr1_20460795_20461296
chr1	20534225	20535054	chr1_20534225_20535054
chr1	20548788	20548961	chr1_20548788_20548961
chr1	20564453	20564909	chr1_20564453_20564909
chr1	20577593	20577801	chr1_20577593_20577801
chr1	20580565	20580762	chr1_20580565_20580762
chr1	20626015	20626196	chr1_20626015_20626196
chr1	20679025	20679277	chr1_20679025_20679277
chr1	20690085	20691174	chr1_20690085_20691174
chr1	20723743	20723888	chr1_20723743_20723888
chr1	20751581	20752003	chr1_20751581_20752003
chr1	20752360	20752535	chr1_20752360_20752535
chr1	20759812	20760106	chr1_20759812_20760106
chr1	20764263	20764873	chr1_20764263_20764873
chr1	20770450	20770593	chr1_20770450_20770593
chr1	20782816	20783154	chr1_20782816_20783154
chr1	20785498	20785646	chr1_20785498_20785646
chr1	20791426	20792207	chr1_20791426_20792207
chr1	20890603	20890776	chr1_20890603_20890776
chr1	20966335	20966565	chr1_20966335_20966565
chr1	20974352	20974868	chr1_20974352_20974868
chr1	20984196	20984774	chr1_20984196_20984774
chr1	21150279	21150950	chr1_21150279_21150950
chr1	21156148	21157348	chr1_21156148_21157348
chr1	21196327	21196904	chr1_21196327_21196904
chr1	21198571	21198724	chr1_21198571_21198724
chr1	21250176	21250402	chr1_21250176_21250402
chr1	21273885	21274172	chr1_21273885_21274172
chr1	21326562	21326777	chr1_21326562_21326777
chr1	21371276	21371565	chr1_21371276_21371565
chr1	21376684	21377220	chr1_21376684_21377220
chr1	21383509	21384085	chr1_21383509_21384085
chr1	21438401	21438591	chr1_21438401_21438591
chr1	21454244	21454419	chr1_21454244_21454419
chr1	21472959	21473666	chr1_21472959_21473666
chr1	21480341	21480520	chr1_21480341_21480520
chr1	21562074	21562249	chr1_21562074_21562249
chr1	21582559	21582835	chr1_21582559_21582835
chr1	21584026	21584183	chr1_21584026_21584183
chr1	21601172	21601344	chr1_21601172_21601344
chr1	21606830	21607114	chr1_21606830_21607114
chr1	21607349	21607672	chr1_21607349_21607672
chr1	21641580	21641765	chr1_21641580_21641765
chr1	21662508	21663912	chr1_21662508_21663912
chr1	21719112	21719755	chr1_21719112_21719755
chr1	21795230	21795539	chr1_21795230_21795539
chr1	21798940	21799373	chr1_21798940_21799373
chr1	21879310	21879458	chr1_21879310_21879458
chr1	21880075	21880433	chr1_21880075_21880433
chr1	21931556	21932026	chr1_21931556_21932026
chr1	21956239	21956995	chr1_21956239_21956995
chr1	21957217	21957432	chr1_21957217_21957432
chr1	21973159	21973391	chr1_21973159_21973391
chr1	22060013	22060520	chr1_22060013_22060520
chr1	22068455	22068669	chr1_22068455_22068669
chr1	22078910	22079137	chr1_22078910_22079137
chr1	22244697	22244866	chr1_22244697_22244866
chr1	22255639	22255917	chr1_22255639_22255917
chr1	22272709	22273255	chr1_22272709_22273255
chr1	22273742	22274346	chr1_22273742_22274346
chr1	22283900	22284465	chr1_22283900_22284465
chr1	22305127	22306317	chr1_22305127_22306317
chr1	22330980	22331371	chr1_22330980_22331371
chr1	22348093	22348276	chr1_22348093_22348276
chr1	22398850	22399235	chr1_22398850_22399235
chr1	22515890	22516579	chr1_22515890_22516579
chr1	22519154	22519527	chr1_22519154_22519527
chr1	22673548	22673997	chr1_22673548_22673997
chr1	22691885	22692266	chr1_22691885_22692266
chr1	22759127	22759308	chr1_22759127_22759308
chr1	22788374	22788518	chr1_22788374_22788518
chr1	22788522	22788717	chr1_22788522_22788717
chr1	22870072	22870381	chr1_22870072_22870381
chr1	22929249	22929475	chr1_22929249_22929475
chr1	22967094	22967811	chr1_22967094_22967811
chr1	23015503	23015706	chr1_23015503_23015706
chr1	23019454	23020173	chr1_23019454_23020173
chr1	23033840	23034669	chr1_23033840_23034669
chr1	23051215	23051398	chr1_23051215_23051398
chr1	23063272	23063807	chr1_23063272_23063807
chr1	23094010	23094714	chr1_23094010_23094714
chr1	23176553	23176803	chr1_23176553_23176803
chr1	23253045	23253383	chr1_23253045_23253383
chr1	23293285	23294084	chr1_23293285_23294084
chr1	23307809	23308308	chr1_23307809_23308308
chr1	23309025	23309524	chr1_23309025_23309524
chr1	23314044	23314488	chr1_23314044_23314488
chr1	23351317	23351591	chr1_23351317_23351591
chr1	23368245	23368867	chr1_23368245_23368867
chr1	23449592	23451166	chr1_23449592_23451166
chr1	23473245	23473492	chr1_23473245_23473492
chr1	23521225	23521465	chr1_23521225_23521465
chr1	23531090	23531931	chr1_23531090_23531931
chr1	23539713	23539982	chr1_23539713_23539982
chr1	23543687	23544175	chr1_23543687_23544175
chr1	23546372	23547070	chr1_23546372_23547070
chr1	23549654	23550017	chr1_23549654_23550017
chr1	23596464	23596670	chr1_23596464_23596670
chr1	23646173	23646432	chr1_23646173_23646432
chr1	23657349	23657527	chr1_23657349_23657527
chr1	23681022	23682492	chr1_23681022_23682492
chr1	23691295	23691609	chr1_23691295_23691609
chr1	23757826	23758237	chr1_23757826_23758237
chr1	23788630	23788884	chr1_23788630_23788884
chr1	23793233	23793802	chr1_23793233_23793802
chr1	23871186	23871543	chr1_23871186_23871543
chr1	23928433	23929883	chr1_23928433_23929883
chr1	23938987	23939218	chr1_23938987_23939218
chr1	23939312	23939612	chr1_23939312_23939612
chr1	23985647	23985834	chr1_23985647_23985834
chr1	24002246	24002471	chr1_24002246_24002471
chr1	24040674	24041323	chr1_24040674_24041323
chr1	24049848	24050107	chr1_24049848_24050107
chr1	24082808	24083285	chr1_24082808_24083285
chr1	24104387	24104721	chr1_24104387_24104721
chr1	24131605	24131791	chr1_24131605_24131791
chr1	24141666	24142236	chr1_24141666_24142236
chr1	24171032	24171272	chr1_24171032_24171272
chr1	24171460	24171618	chr1_24171460_24171618
chr1	24201187	24201445	chr1_24201187_24201445
chr1	24246866	24247097	chr1_24246866_24247097
chr1	24266384	24266585	chr1_24266384_24266585
chr1	24268218	24268445	chr1_24268218_24268445
chr1	24282924	24283095	chr1_24282924_24283095
chr1	24299173	24300100	chr1_24299173_24300100
chr1	24301904	24303101	chr1_24301904_24303101
chr1	24323596	24323942	chr1_24323596_24323942
chr1	24354510	24355014	chr1_24354510_24355014
chr1	24381726	24381995	chr1_24381726_24381995
chr1	24383022	24383684	chr1_24383022_24383684
chr1	24385144	24385903	chr1_24385144_24385903
chr1	24391769	24391953	chr1_24391769_24391953
chr1	24411711	24411889	chr1_24411711_24411889
chr1	24440108	24440352	chr1_24440108_24440352
chr1	24463940	24464141	chr1_24463940_24464141
chr1	24487685	24487934	chr1_24487685_24487934
chr1	24527692	24527862	chr1_24527692_24527862
chr1	24527914	24528145	chr1_24527914_24528145
chr1	24578419	24578621	chr1_24578419_24578621
chr1	24640155	24641162	chr1_24640155_24641162
chr1	24817675	24818375	chr1_24817675_24818375
chr1	24823431	24824160	chr1_24823431_24824160
chr1	24832754	24833087	chr1_24832754_24833087
chr1	24833220	24834320	chr1_24833220_24834320
chr1	24839756	24840280	chr1_24839756_24840280
chr1	24841206	24841373	chr1_24841206_24841373
chr1	24842127	24842385	chr1_24842127_24842385
chr1	24855721	24856257	chr1_24855721_24856257
chr1	24957791	24958943	chr1_24957791_24958943
chr1	24983265	24983492	chr1_24983265_24983492
chr1	24995016	24995301	chr1_24995016_24995301
chr1	24995745	24996278	chr1_24995745_24996278
chr1	24999746	24999995	chr1_24999746_24999995
chr1	25000438	25000948	chr1_25000438_25000948
chr1	25001144	25001338	chr1_25001144_25001338
chr1	25028852	25029266	chr1_25028852_25029266
chr1	25090436	25091227	chr1_25090436_25091227
chr1	25120862	25121421	chr1_25120862_25121421
chr1	25142474	25143050	chr1_25142474_25143050
chr1	25238658	25239107	chr1_25238658_25239107
chr1	25250431	25250715	chr1_25250431_25250715
chr1	25284879	25286698	chr1_25284879_25286698
chr1	25312519	25312670	chr1_25312519_25312670
chr1	25349926	25350060	chr1_25349926_25350060
chr1	25366731	25367729	chr1_25366731_25367729
chr1	25374045	25374241	chr1_25374045_25374241
chr1	25375450	25375635	chr1_25375450_25375635
chr1	25470768	25471185	chr1_25470768_25471185
chr1	25472074	25472346	chr1_25472074_25472346
chr1	25542113	25542327	chr1_25542113_25542327
chr1	25552054	25553042	chr1_25552054_25553042
chr1	25593826	25594207	chr1_25593826_25594207
chr1	25694877	25695103	chr1_25694877_25695103
chr1	25709905	25710077	chr1_25709905_25710077
chr1	25753289	25754224	chr1_25753289_25754224
chr1	25817482	25817691	chr1_25817482_25817691
chr1	25835701	25836449	chr1_25835701_25836449
chr1	25881596	25881877	chr1_25881596_25881877
chr1	25941878	25942202	chr1_25941878_25942202
chr1	25949126	25950105	chr1_25949126_25950105
chr1	26286305	26286976	chr1_26286305_26286976
chr1	26339765	26340036	chr1_26339765_26340036
chr1	26396558	26397922	chr1_26396558_26397922
chr1	26445120	26445830	chr1_26445120_26445830
chr1	26581447	26581955	chr1_26581447_26581955
chr1	26584818	26585048	chr1_26584818_26585048
chr1	26604993	26605574	chr1_26604993_26605574
chr1	26690941	26691142	chr1_26690941_26691142
chr1	26795577	26795838	chr1_26795577_26795838
chr1	26798263	26798510	chr1_26798263_26798510
chr1	26802871	26803302	chr1_26802871_26803302
chr1	26923031	26923255	chr1_26923031_26923255
chr1	26930039	26930279	chr1_26930039_26930279
chr1	26956726	26957002	chr1_26956726_26957002
chr1	26964515	26965085	chr1_26964515_26965085
chr1	27089260	27090005	chr1_27089260_27090005
chr1	27121702	27122075	chr1_27121702_27122075
chr1	27337896	27338491	chr1_27337896_27338491
chr1	27364434	27365319	chr1_27364434_27365319
chr1	27499591	27500345	chr1_27499591_27500345
chr1	27543086	27544172	chr1_27543086_27544172
chr1	27562986	27563228	chr1_27562986_27563228
chr1	27957062	27957711	chr1_27957062_27957711
chr1	28011906	28012062	chr1_28011906_28012062
chr1	28125265	28125473	chr1_28125265_28125473
chr1	28157323	28157652	chr1_28157323_28157652
chr1	28191491	28192000	chr1_28191491_28192000
chr1	28344345	28345303	chr1_28344345_28345303
chr1	28377621	28378734	chr1_28377621_28378734
chr1	28463153	28463375	chr1_28463153_28463375
chr1	28487705	28488091	chr1_28487705_28488091
chr1	28520736	28522315	chr1_28520736_28522315
chr1	28605101	28605330	chr1_28605101_28605330
chr1	28622040	28622933	chr1_28622040_28622933
chr1	28686091	28686358	chr1_28686091_28686358
chr1	28688003	28688295	chr1_28688003_28688295
chr1	28732154	28733016	chr1_28732154_28733016
chr1	28746946	28747243	chr1_28746946_28747243
chr1	29106413	29106775	chr1_29106413_29106775
chr1	29139317	29139589	chr1_29139317_29139589
chr1	29274046	29274303	chr1_29274046_29274303
chr1	29278512	29278899	chr1_29278512_29278899
chr1	29317978	29318495	chr1_29317978_29318495
chr1	29623113	29623455	chr1_29623113_29623455
chr1	29793957	29794336	chr1_29793957_29794336
chr1	29847875	29848634	chr1_29847875_29848634
chr1	29871676	29871889	chr1_29871676_29871889
chr1	30035135	30036372	chr1_30035135_30036372
chr1	30117794	30118085	chr1_30117794_30118085
chr1	30175682	30176002	chr1_30175682_30176002
chr1	30255911	30256415	chr1_30255911_30256415
chr1	30261554	30261749	chr1_30261554_30261749
chr1	30273641	30273957	chr1_30273641_30273957
chr1	30316376	30316857	chr1_30316376_30316857
chr1	30316964	30317175	chr1_30316964_30317175
chr1	30331461	30331966	chr1_30331461_30331966
chr1	30436679	30436880	chr1_30436679_30436880
chr1	30470454	30471207	chr1_30470454_30471207
chr1	30471740	30472056	chr1_30471740_30472056
chr1	30486076	30486224	chr1_30486076_30486224
chr1	30511299	30511470	chr1_30511299_30511470
chr1	30546063	30546276	chr1_30546063_30546276
chr1	30567282	30567611	chr1_30567282_30567611
chr1	30572949	30573442	chr1_30572949_30573442
chr1	30589419	30589831	chr1_30589419_30589831
chr1	30605103	30606276	chr1_30605103_30606276
chr1	30621018	30621194	chr1_30621018_30621194
chr1	30621318	30622121	chr1_30621318_30622121
chr1	30641485	30642095	chr1_30641485_30642095
chr1	30696565	30697261	chr1_30696565_30697261
chr1	30713280	30713458	chr1_30713280_30713458
chr1	30753152	30753464	chr1_30753152_30753464
chr1	30835366	30835726	chr1_30835366_30835726
chr1	30960568	30960952	chr1_30960568_30960952
chr1	30965676	30966127	chr1_30965676_30966127
chr1	30977610	30978588	chr1_30977610_30978588
chr1	30979165	30979561	chr1_30979165_30979561
chr1	30997667	30997840	chr1_30997667_30997840
chr1	31000185	31000849	chr1_31000185_31000849
chr1	31068397	31069071	chr1_31068397_31069071
chr1	31070867	31071630	chr1_31070867_31071630
chr1	31117312	31117700	chr1_31117312_31117700
chr1	31266925	31267208	chr1_31266925_31267208
chr1	31392052	31392698	chr1_31392052_31392698
chr1	31393871	31394216	chr1_31393871_31394216
chr1	31395710	31395917	chr1_31395710_31395917
chr1	31402329	31402828	chr1_31402329_31402828
chr1	31403060	31403266	chr1_31403060_31403266
chr1	31672996	31673241	chr1_31672996_31673241
chr1	31682901	31683070	chr1_31682901_31683070
chr1	31702047	31702320	chr1_31702047_31702320
chr1	31735097	31736002	chr1_31735097_31736002
chr1	31757843	31758339	chr1_31757843_31758339
chr1	31786574	31786856	chr1_31786574_31786856
chr1	31834994	31835378	chr1_31834994_31835378
chr1	31839960	31840180	chr1_31839960_31840180
chr1	31868346	31868598	chr1_31868346_31868598
chr1	31948865	31949341	chr1_31948865_31949341
chr1	31964718	31964864	chr1_31964718_31964864
chr1	31988469	31989305	chr1_31988469_31989305
chr1	31994670	31995274	chr1_31994670_31995274
chr1	32052873	32053119	chr1_32052873_32053119
chr1	32150000	32150229	chr1_32150000_32150229
chr1	32184756	32184910	chr1_32184756_32184910
chr1	32231788	32231988	chr1_32231788_32231988
chr1	32341506	32341657	chr1_32341506_32341657
chr1	32343676	32344723	chr1_32343676_32344723
chr1	32344950	32345204	chr1_32344950_32345204
chr1	32347319	32348421	chr1_32347319_32348421
chr1	32487278	32487679	chr1_32487278_32487679
chr1	32638723	32638983	chr1_32638723_32638983
chr1	32639062	32639209	chr1_32639062_32639209
chr1	32641792	32642040	chr1_32641792_32642040
chr1	32756990	32757428	chr1_32756990_32757428
chr1	32758848	32759493	chr1_32758848_32759493
chr1	32801688	32802020	chr1_32801688_32802020
chr1	32862492	32862971	chr1_32862492_32862971
chr1	32886286	32886582	chr1_32886286_32886582
chr1	32891711	32892147	chr1_32891711_32892147
chr1	32893279	32893672	chr1_32893279_32893672
chr1	32914976	32915255	chr1_32914976_32915255
chr1	32929776	32930339	chr1_32929776_32930339
chr1	32972794	32973049	chr1_32972794_32973049
chr1	32987357	32987611	chr1_32987357_32987611
chr1	32987652	32988043	chr1_32987652_32988043
chr1	32989525	32989701	chr1_32989525_32989701
chr1	33020116	33020392	chr1_33020116_33020392
chr1	33021588	33022291	chr1_33021588_33022291
chr1	33079583	33079954	chr1_33079583_33079954
chr1	33083666	33083832	chr1_33083666_33083832
chr1	33141884	33142048	chr1_33141884_33142048
chr1	33162793	33163702	chr1_33162793_33163702
chr1	33181705	33181873	chr1_33181705_33181873
chr1	33181908	33182364	chr1_33181908_33182364
chr1	33193878	33194155	chr1_33193878_33194155
chr1	33230321	33230579	chr1_33230321_33230579
chr1	33232632	33232846	chr1_33232632_33232846
chr1	33260478	33260724	chr1_33260478_33260724
chr1	33279701	33280404	chr1_33279701_33280404
chr1	33313633	33314027	chr1_33313633_33314027
chr1	33317744	33317954	chr1_33317744_33317954
chr1	33322450	33323193	chr1_33322450_33323193
chr1	33352722	33353215	chr1_33352722_33353215
chr1	33381987	33382275	chr1_33381987_33382275
chr1	33452677	33452914	chr1_33452677_33452914
chr1	33459667	33459917	chr1_33459667_33459917
chr1	33464435	33464933	chr1_33464435_33464933
chr1	33505574	33505738	chr1_33505574_33505738
chr1	33537193	33537826	chr1_33537193_33537826
chr1	33538714	33539050	chr1_33538714_33539050
chr1	33546838	33547072	chr1_33546838_33547072
chr1	33558454	33558707	chr1_33558454_33558707
chr1	33564430	33564664	chr1_33564430_33564664
chr1	33565329	33565508	chr1_33565329_33565508
chr1	33580965	33581392	chr1_33580965_33581392
chr1	33588377	33588538	chr1_33588377_33588538
chr1	33642139	33642488	chr1_33642139_33642488
chr1	33647848	33648336	chr1_33647848_33648336
chr1	33678370	33679277	chr1_33678370_33679277
chr1	33694495	33695211	chr1_33694495_33695211
chr1	33704181	33704311	chr1_33704181_33704311
chr1	33705742	33705925	chr1_33705742_33705925
chr1	33729157	33729552	chr1_33729157_33729552
chr1	33748034	33748794	chr1_33748034_33748794
chr1	33790617	33791341	chr1_33790617_33791341
chr1	33856596	33857015	chr1_33856596_33857015
chr1	33900771	33900938	chr1_33900771_33900938
chr1	34089859	34090250	chr1_34089859_34090250
chr1	34145480	34145849	chr1_34145480_34145849
chr1	34179829	34180392	chr1_34179829_34180392
chr1	34210596	34210777	chr1_34210596_34210777
chr1	34215673	34216018	chr1_34215673_34216018
chr1	34216763	34217216	chr1_34216763_34217216
chr1	34257046	34257194	chr1_34257046_34257194
chr1	34272945	34273834	chr1_34272945_34273834
chr1	34422594	34423623	chr1_34422594_34423623
chr1	34428669	34429021	chr1_34428669_34429021
chr1	34526788	34527151	chr1_34526788_34527151
chr1	34542126	34543046	chr1_34542126_34543046
chr1	34555647	34555836	chr1_34555647_34555836
chr1	34573291	34574329	chr1_34573291_34574329
chr1	34576323	34576691	chr1_34576323_34576691
chr1	34593186	34594278	chr1_34593186_34594278
chr1	34630059	34630236	chr1_34630059_34630236
chr1	34656662	34656834	chr1_34656662_34656834
chr1	34658731	34659777	chr1_34658731_34659777
chr1	34675719	34676011	chr1_34675719_34676011
chr1	34743139	34743269	chr1_34743139_34743269
chr1	34745094	34745575	chr1_34745094_34745575
chr1	34747313	34747638	chr1_34747313_34747638
chr1	34761575	34761733	chr1_34761575_34761733
chr1	34821763	34821945	chr1_34821763_34821945
chr1	34868094	34868281	chr1_34868094_34868281
chr1	34868319	34868867	chr1_34868319_34868867
chr1	34907969	34909572	chr1_34907969_34909572
chr1	34914073	34914556	chr1_34914073_34914556
chr1	34924081	34924361	chr1_34924081_34924361
chr1	34948419	34948726	chr1_34948419_34948726
chr1	34952996	34953380	chr1_34952996_34953380
chr1	34953795	34954008	chr1_34953795_34954008
chr1	35044929	35045334	chr1_35044929_35045334
chr1	35051326	35051655	chr1_35051326_35051655
chr1	35074479	35074727	chr1_35074479_35074727
chr1	35132363	35132624	chr1_35132363_35132624
chr1	35172579	35172837	chr1_35172579_35172837
chr1	35235404	35235537	chr1_35235404_35235537
chr1	35251013	35251356	chr1_35251013_35251356
chr1	35269088	35269557	chr1_35269088_35269557
chr1	35276682	35276975	chr1_35276682_35276975
chr1	35300786	35301034	chr1_35300786_35301034
chr1	35311825	35312198	chr1_35311825_35312198
chr1	35322524	35322686	chr1_35322524_35322686
chr1	35322879	35323096	chr1_35322879_35323096
chr1	35447349	35447681	chr1_35447349_35447681
chr1	35447766	35448119	chr1_35447766_35448119
chr1	35450380	35450773	chr1_35450380_35450773
chr1	35473182	35473713	chr1_35473182_35473713
chr1	35514216	35514853	chr1_35514216_35514853
chr1	35535086	35535345	chr1_35535086_35535345
chr1	35571548	35572115	chr1_35571548_35572115
chr1	35617482	35617737	chr1_35617482_35617737
chr1	35645694	35646056	chr1_35645694_35646056
chr1	35737462	35737907	chr1_35737462_35737907
chr1	35745240	35745716	chr1_35745240_35745716
chr1	35763854	35764025	chr1_35763854_35764025
chr1	35812291	35812934	chr1_35812291_35812934
chr1	35863943	35864093	chr1_35863943_35864093
chr1	35896189	35896774	chr1_35896189_35896774
chr1	35962480	35962844	chr1_35962480_35962844
chr1	35999860	36000123	chr1_35999860_36000123
chr1	36024764	36024999	chr1_36024764_36024999
chr1	36032653	36033014	chr1_36032653_36033014
chr1	36119173	36119305	chr1_36119173_36119305
chr1	36257152	36257572	chr1_36257152_36257572
chr1	36412254	36412577	chr1_36412254_36412577
chr1	36420505	36420665	chr1_36420505_36420665
chr1	36739553	36740416	chr1_36739553_36740416
chr1	36780505	36780687	chr1_36780505_36780687
chr1	36780832	36781456	chr1_36780832_36781456
chr1	36794027	36794592	chr1_36794027_36794592
chr1	36835514	36835764	chr1_36835514_36835764
chr1	36881628	36881810	chr1_36881628_36881810
chr1	37014276	37014586	chr1_37014276_37014586
chr1	37042711	37043142	chr1_37042711_37043142
chr1	37085798	37086617	chr1_37085798_37086617
chr1	37158336	37159014	chr1_37158336_37159014
chr1	37189367	37189549	chr1_37189367_37189549
chr1	37276835	37277333	chr1_37276835_37277333
chr1	37390477	37390760	chr1_37390477_37390760
chr1	37556136	37556329	chr1_37556136_37556329
chr1	37597333	37598400	chr1_37597333_37598400
chr1	37681184	37681326	chr1_37681184_37681326
chr1	37692700	37693243	chr1_37692700_37693243
chr1	37921347	37922427	chr1_37921347_37922427
chr1	37975346	37975512	chr1_37975346_37975512
chr1	37988627	37988996	chr1_37988627_37988996
chr1	37995604	37995779	chr1_37995604_37995779
chr1	38107114	38107604	chr1_38107114_38107604
chr1	38112780	38112951	chr1_38112780_38112951
chr1	38250147	38250443	chr1_38250147_38250443
chr1	38412317	38412463	chr1_38412317_38412463
chr1	38482900	38483144	chr1_38482900_38483144
chr1	38692529	38692703	chr1_38692529_38692703
chr1	38706827	38707279	chr1_38706827_38707279
chr1	38906041	38906220	chr1_38906041_38906220
chr1	38907481	38907630	chr1_38907481_38907630
chr1	38968246	38968442	chr1_38968246_38968442
chr1	38991548	38991875	chr1_38991548_38991875
chr1	38993608	38993900	chr1_38993608_38993900
chr1	39057828	39058823	chr1_39057828_39058823
chr1	39078116	39078266	chr1_39078116_39078266
chr1	39113452	39113600	chr1_39113452_39113600
chr1	39169890	39170089	chr1_39169890_39170089
chr1	39376601	39376915	chr1_39376601_39376915
chr1	39563930	39564135	chr1_39563930_39564135
chr1	39577079	39577388	chr1_39577079_39577388
chr1	39620125	39620311	chr1_39620125_39620311
chr1	39630776	39631004	chr1_39630776_39631004
chr1	39650804	39651000	chr1_39650804_39651000
chr1	39711717	39712269	chr1_39711717_39712269
chr1	39723673	39724307	chr1_39723673_39724307
chr1	39776219	39776570	chr1_39776219_39776570
chr1	39872563	39872833	chr1_39872563_39872833
chr1	40040018	40040162	chr1_40040018_40040162
chr1	40065973	40066145	chr1_40065973_40066145
chr1	40240391	40240622	chr1_40240391_40240622
chr1	40251105	40251417	chr1_40251105_40251417
chr1	40325356	40325540	chr1_40325356_40325540
chr1	40334715	40335703	chr1_40334715_40335703
chr1	40336177	40336556	chr1_40336177_40336556
chr1	40382099	40383087	chr1_40382099_40383087
chr1	40488699	40488852	chr1_40488699_40488852
chr1	40603887	40605329	chr1_40603887_40605329
chr1	40664756	40664978	chr1_40664756_40664978
chr1	40673902	40674216	chr1_40673902_40674216
chr1	40734293	40734563	chr1_40734293_40734563
chr1	40859576	40859838	chr1_40859576_40859838
chr1	40901001	40901943	chr1_40901001_40901943
chr1	40904556	40904704	chr1_40904556_40904704
chr1	40907248	40907864	chr1_40907248_40907864
chr1	40921970	40922158	chr1_40921970_40922158
chr1	40981044	40981252	chr1_40981044_40981252
chr1	41071046	41071363	chr1_41071046_41071363
chr1	41209486	41210581	chr1_41209486_41210581
chr1	41213475	41213895	chr1_41213475_41213895
chr1	41319966	41320158	chr1_41319966_41320158
chr1	41320848	41321590	chr1_41320848_41321590
chr1	41418373	41418522	chr1_41418373_41418522
chr1	41436737	41437492	chr1_41436737_41437492
chr1	41440844	41440986	chr1_41440844_41440986
chr1	41441599	41441883	chr1_41441599_41441883
chr1	41561836	41562155	chr1_41561836_41562155
chr1	41609713	41610032	chr1_41609713_41610032
chr1	41647229	41647545	chr1_41647229_41647545
chr1	41661974	41662870	chr1_41661974_41662870
chr1	41667525	41668252	chr1_41667525_41668252
chr1	41677976	41678360	chr1_41677976_41678360
chr1	41715376	41716060	chr1_41715376_41716060
chr1	41727456	41727644	chr1_41727456_41727644
chr1	41765360	41765514	chr1_41765360_41765514
chr1	41799343	41800634	chr1_41799343_41800634
chr1	41867293	41868440	chr1_41867293_41868440
chr1	41869076	41869245	chr1_41869076_41869245
chr1	41879816	41879977	chr1_41879816_41879977
chr1	41914617	41914782	chr1_41914617_41914782
chr1	41975809	41975943	chr1_41975809_41975943
chr1	42091645	42092511	chr1_42091645_42092511
chr1	42114897	42116313	chr1_42114897_42116313
chr1	42201650	42201882	chr1_42201650_42201882
chr1	42215763	42215934	chr1_42215763_42215934
chr1	42290161	42290460	chr1_42290161_42290460
chr1	42366388	42366733	chr1_42366388_42366733
chr1	42380445	42380595	chr1_42380445_42380595
chr1	42422616	42422900	chr1_42422616_42422900
chr1	42493385	42493939	chr1_42493385_42493939
chr1	42546461	42546687	chr1_42546461_42546687
chr1	42566534	42566798	chr1_42566534_42566798
chr1	42597808	42598217	chr1_42597808_42598217
chr1	42616095	42616260	chr1_42616095_42616260
chr1	42748226	42748624	chr1_42748226_42748624
chr1	42812009	42812180	chr1_42812009_42812180
chr1	42847948	42848182	chr1_42847948_42848182
chr1	42879843	42880348	chr1_42879843_42880348
chr1	42913246	42913488	chr1_42913246_42913488
chr1	42920773	42920944	chr1_42920773_42920944
chr1	42927482	42927637	chr1_42927482_42927637
chr1	42977847	42978245	chr1_42977847_42978245
chr1	42994323	42994650	chr1_42994323_42994650
chr1	43037303	43037508	chr1_43037303_43037508
chr1	43108607	43109159	chr1_43108607_43109159
chr1	43112181	43112480	chr1_43112181_43112480
chr1	43114652	43114789	chr1_43114652_43114789
chr1	43242919	43243796	chr1_43242919_43243796
chr1	43267703	43267866	chr1_43267703_43267866
chr1	43322710	43323037	chr1_43322710_43323037
chr1	43341556	43341966	chr1_43341556_43341966
chr1	43348702	43349205	chr1_43348702_43349205
chr1	43612528	43613010	chr1_43612528_43613010
chr1	43646008	43646167	chr1_43646008_43646167
chr1	43646198	43646990	chr1_43646198_43646990
chr1	43716999	43717192	chr1_43716999_43717192
chr1	43737492	43737646	chr1_43737492_43737646
chr1	43775092	43775375	chr1_43775092_43775375
chr1	43775572	43775838	chr1_43775572_43775838
chr1	43779896	43780120	chr1_43779896_43780120
chr1	43814328	43814601	chr1_43814328_43814601
chr1	43866162	43866535	chr1_43866162_43866535
chr1	43952332	43952783	chr1_43952332_43952783
chr1	44023592	44024070	chr1_44023592_44024070
chr1	44074335	44074932	chr1_44074335_44074932
chr1	44110579	44110720	chr1_44110579_44110720
chr1	44141039	44141264	chr1_44141039_44141264
chr1	44221787	44222008	chr1_44221787_44222008
chr1	44228496	44228923	chr1_44228496_44228923
chr1	44230325	44230985	chr1_44230325_44230985
chr1	44259812	44260230	chr1_44259812_44260230
chr1	44291324	44292472	chr1_44291324_44292472
chr1	44301607	44301994	chr1_44301607_44301994
chr1	44405006	44405231	chr1_44405006_44405231
chr1	44445657	44446215	chr1_44445657_44446215
chr1	44448884	44449153	chr1_44448884_44449153
chr1	44452053	44452806	chr1_44452053_44452806
chr1	44454784	44455439	chr1_44454784_44455439
chr1	44466004	44466880	chr1_44466004_44466880
chr1	44601350	44601567	chr1_44601350_44601567
chr1	44637268	44637573	chr1_44637268_44637573
chr1	44701806	44702065	chr1_44701806_44702065
chr1	44768502	44768933	chr1_44768502_44768933
chr1	44785297	44785700	chr1_44785297_44785700
chr1	44915734	44916023	chr1_44915734_44916023
chr1	44930762	44931006	chr1_44930762_44931006
chr1	44948340	44948862	chr1_44948340_44948862
chr1	45047748	45048102	chr1_45047748_45048102
chr1	45325195	45326082	chr1_45325195_45326082
chr1	45372725	45372910	chr1_45372725_45372910
chr1	45404230	45404395	chr1_45404230_45404395
chr1	45416609	45416936	chr1_45416609_45416936
chr1	45495802	45496338	chr1_45495802_45496338
chr1	45604824	45606107	chr1_45604824_45606107
chr1	45631938	45632560	chr1_45631938_45632560
chr1	45651642	45651933	chr1_45651642_45651933
chr1	45729568	45729783	chr1_45729568_45729783
chr1	45784432	45785114	chr1_45784432_45785114
chr1	45818859	45819029	chr1_45818859_45819029
chr1	45939959	45941112	chr1_45939959_45941112
chr1	45947213	45947404	chr1_45947213_45947404
chr1	45966894	45967191	chr1_45966894_45967191
chr1	45977745	45977969	chr1_45977745_45977969
chr1	45988134	45988397	chr1_45988134_45988397
chr1	46060449	46060774	chr1_46060449_46060774
chr1	46060851	46061210	chr1_46060851_46061210
chr1	46064990	46065152	chr1_46064990_46065152
chr1	46075184	46075715	chr1_46075184_46075715
chr1	46089968	46090124	chr1_46089968_46090124
chr1	46173858	46174760	chr1_46173858_46174760
chr1	46179635	46180531	chr1_46179635_46180531
chr1	46184849	46185651	chr1_46184849_46185651
chr1	46192128	46192558	chr1_46192128_46192558
chr1	46228198	46228487	chr1_46228198_46228487
chr1	46246601	46246773	chr1_46246601_46246773
chr1	46399042	46400238	chr1_46399042_46400238
chr1	46409575	46409770	chr1_46409575_46409770
chr1	46433936	46434149	chr1_46433936_46434149
chr1	46435804	46436405	chr1_46435804_46436405
chr1	46439767	46440127	chr1_46439767_46440127
chr1	46465374	46466005	chr1_46465374_46466005
chr1	46471800	46471975	chr1_46471800_46471975
chr1	46485375	46485642	chr1_46485375_46485642
chr1	46706298	46707530	chr1_46706298_46707530
chr1	46933510	46933778	chr1_46933510_46933778
chr1	46971265	46971525	chr1_46971265_46971525
chr1	47054349	47055370	chr1_47054349_47055370
chr1	47055739	47056152	chr1_47055739_47056152
chr1	47062336	47062724	chr1_47062336_47062724
chr1	47063770	47064161	chr1_47063770_47064161
chr1	47070985	47071884	chr1_47070985_47071884
chr1	47150504	47150694	chr1_47150504_47150694
chr1	47173628	47174101	chr1_47173628_47174101
chr1	47220690	47221507	chr1_47220690_47221507
chr1	47238226	47238578	chr1_47238226_47238578
chr1	47264163	47264653	chr1_47264163_47264653
chr1	47363580	47364578	chr1_47363580_47364578
chr1	47491983	47492731	chr1_47491983_47492731
chr1	47502792	47503043	chr1_47502792_47503043
chr1	47513639	47513940	chr1_47513639_47513940
chr1	47523453	47523844	chr1_47523453_47523844
chr1	47602253	47603092	chr1_47602253_47603092
chr1	47620461	47620804	chr1_47620461_47620804
chr1	47722245	47722423	chr1_47722245_47722423
chr1	47722462	47722716	chr1_47722462_47722716
chr1	47725164	47725527	chr1_47725164_47725527
chr1	47777864	47778150	chr1_47777864_47778150
chr1	47883399	47884697	chr1_47883399_47884697
chr1	47890680	47891231	chr1_47890680_47891231
chr1	47971010	47972085	chr1_47971010_47972085
chr1	47976332	47976621	chr1_47976332_47976621
chr1	47986542	47986901	chr1_47986542_47986901
chr1	48208151	48208282	chr1_48208151_48208282
chr1	48380731	48380961	chr1_48380731_48380961
chr1	48480883	48481391	chr1_48480883_48481391
chr1	48536929	48537212	chr1_48536929_48537212
chr1	48691302	48692433	chr1_48691302_48692433
chr1	48735272	48735695	chr1_48735272_48735695
chr1	48736525	48736819	chr1_48736525_48736819
chr1	48755493	48756018	chr1_48755493_48756018
chr1	48759372	48759566	chr1_48759372_48759566
chr1	48788170	48788389	chr1_48788170_48788389
chr1	48907119	48907322	chr1_48907119_48907322
chr1	49289132	49289342	chr1_49289132_49289342
chr1	49289482	49290051	chr1_49289482_49290051
chr1	49317709	49318006	chr1_49317709_49318006
chr1	49459528	49459745	chr1_49459528_49459745
chr1	49521496	49521940	chr1_49521496_49521940
chr1	49523961	49524256	chr1_49523961_49524256
chr1	49531485	49531728	chr1_49531485_49531728
chr1	49574126	49574387	chr1_49574126_49574387
chr1	49576925	49577272	chr1_49576925_49577272
chr1	49765637	49765949	chr1_49765637_49765949
chr1	49936106	49936776	chr1_49936106_49936776
chr1	49937749	49937979	chr1_49937749_49937979
chr1	49942225	49943051	chr1_49942225_49943051
chr1	49990508	49990663	chr1_49990508_49990663
chr1	49990904	49992032	chr1_49990904_49992032
chr1	50082444	50083132	chr1_50082444_50083132
chr1	50102586	50103389	chr1_50102586_50103389
chr1	50115051	50115369	chr1_50115051_50115369
chr1	50139388	50139898	chr1_50139388_50139898
chr1	50156352	50156826	chr1_50156352_50156826
chr1	50193324	50193572	chr1_50193324_50193572
chr1	50222367	50222836	chr1_50222367_50222836
chr1	50427912	50428453	chr1_50427912_50428453
chr1	50456799	50457640	chr1_50456799_50457640
chr1	50537289	50538211	chr1_50537289_50538211
chr1	50624920	50625727	chr1_50624920_50625727
chr1	50636787	50636977	chr1_50636787_50636977
chr1	50679606	50680451	chr1_50679606_50680451
chr1	50704111	50704470	chr1_50704111_50704470
chr1	50709160	50709318	chr1_50709160_50709318
chr1	50761571	50762028	chr1_50761571_50762028
chr1	50788992	50789235	chr1_50788992_50789235
chr1	50827129	50827372	chr1_50827129_50827372
chr1	50846901	50847554	chr1_50846901_50847554
chr1	50852038	50852641	chr1_50852038_50852641
chr1	50862427	50862577	chr1_50862427_50862577
chr1	50868867	50869551	chr1_50868867_50869551
chr1	50872854	50873467	chr1_50872854_50873467
chr1	50880127	50880467	chr1_50880127_50880467
chr1	50888482	50888738	chr1_50888482_50888738
chr1	50938609	50938836	chr1_50938609_50938836
chr1	50957017	50957573	chr1_50957017_50957573
chr1	51047359	51047664	chr1_51047359_51047664
chr1	51067714	51068555	chr1_51067714_51068555
chr1	51101589	51102040	chr1_51101589_51102040
chr1	51202534	51202678	chr1_51202534_51202678
chr1	51202683	51203107	chr1_51202683_51203107
chr1	51250768	51250902	chr1_51250768_51250902
chr1	51286267	51286872	chr1_51286267_51286872
chr1	51417385	51417624	chr1_51417385_51417624
chr1	51418155	51418383	chr1_51418155_51418383
chr1	51438429	51438574	chr1_51438429_51438574
chr1	51443488	51444381	chr1_51443488_51444381
chr1	51469746	51470140	chr1_51469746_51470140
chr1	51477941	51478180	chr1_51477941_51478180
chr1	51480904	51481945	chr1_51480904_51481945
chr1	51556182	51556503	chr1_51556182_51556503
chr1	51657205	51657635	chr1_51657205_51657635
chr1	51707086	51707823	chr1_51707086_51707823
chr1	51725887	51726089	chr1_51725887_51726089
chr1	51800860	51801115	chr1_51800860_51801115
chr1	51833693	51833857	chr1_51833693_51833857
chr1	52032466	52032779	chr1_52032466_52032779
chr1	52065116	52066180	chr1_52065116_52066180
chr1	52093832	52094102	chr1_52093832_52094102
chr1	52106591	52107033	chr1_52106591_52107033
chr1	52123349	52124129	chr1_52123349_52124129
chr1	52201822	52201994	chr1_52201822_52201994
chr1	52203330	52203876	chr1_52203330_52203876
chr1	52273789	52273952	chr1_52273789_52273952
chr1	52337246	52337429	chr1_52337246_52337429
chr1	52362707	52362918	chr1_52362707_52362918
chr1	52369154	52369677	chr1_52369154_52369677
chr1	52377903	52378197	chr1_52377903_52378197
chr1	52449736	52450034	chr1_52449736_52450034
chr1	52507816	52508689	chr1_52507816_52508689
chr1	52513421	52514052	chr1_52513421_52514052
chr1	52584264	52584820	chr1_52584264_52584820
chr1	52586881	52587086	chr1_52586881_52587086
chr1	52768641	52768771	chr1_52768641_52768771
chr1	52812133	52812420	chr1_52812133_52812420
chr1	52839655	52840020	chr1_52839655_52840020
chr1	52863518	52863824	chr1_52863518_52863824
chr1	52917093	52917452	chr1_52917093_52917452
chr1	52940062	52940305	chr1_52940062_52940305
chr1	52975328	52975799	chr1_52975328_52975799
chr1	52975860	52976072	chr1_52975860_52976072
chr1	52994971	52997085	chr1_52994971_52997085
chr1	53011975	53012250	chr1_53011975_53012250
chr1	53021367	53022048	chr1_53021367_53022048
chr1	53024432	53024889	chr1_53024432_53024889
chr1	53028856	53029323	chr1_53028856_53029323
chr1	53089229	53089600	chr1_53089229_53089600
chr1	53091804	53092214	chr1_53091804_53092214
chr1	53105763	53106045	chr1_53105763_53106045
chr1	53115899	53116383	chr1_53115899_53116383
chr1	53118763	53119284	chr1_53118763_53119284
chr1	53119943	53120098	chr1_53119943_53120098
chr1	53122443	53122676	chr1_53122443_53122676
chr1	53168695	53168921	chr1_53168695_53168921
chr1	53199939	53200098	chr1_53199939_53200098
chr1	53238386	53238576	chr1_53238386_53238576
chr1	53247695	53248476	chr1_53247695_53248476
chr1	53252210	53252397	chr1_53252210_53252397
chr1	53266908	53267291	chr1_53266908_53267291
chr1	53281563	53281948	chr1_53281563_53281948
chr1	53390511	53390755	chr1_53390511_53390755
chr1	53408570	53408759	chr1_53408570_53408759
chr1	53434254	53435154	chr1_53434254_53435154
chr1	53443693	53443846	chr1_53443693_53443846
chr1	53450805	53451257	chr1_53450805_53451257
chr1	53462671	53463032	chr1_53462671_53463032
chr1	53522356	53522524	chr1_53522356_53522524
chr1	53582898	53583102	chr1_53582898_53583102
chr1	53670012	53670689	chr1_53670012_53670689
chr1	53686430	53687007	chr1_53686430_53687007
chr1	53692899	53693754	chr1_53692899_53693754
chr1	53724775	53725135	chr1_53724775_53725135
chr1	53766437	53767189	chr1_53766437_53767189
chr1	53802639	53803221	chr1_53802639_53803221
chr1	53806447	53808305	chr1_53806447_53808305
chr1	54096059	54096363	chr1_54096059_54096363
chr1	54097056	54097288	chr1_54097056_54097288
chr1	54097394	54097578	chr1_54097394_54097578
chr1	54147286	54147466	chr1_54147286_54147466
chr1	54152169	54152595	chr1_54152169_54152595
chr1	54203594	54203989	chr1_54203594_54203989
chr1	54233029	54233272	chr1_54233029_54233272
chr1	54322199	54322646	chr1_54322199_54322646
chr1	54342849	54343084	chr1_54342849_54343084
chr1	54370312	54371168	chr1_54370312_54371168
chr1	54379766	54380259	chr1_54379766_54380259
chr1	54384451	54385353	chr1_54384451_54385353
chr1	54419878	54420105	chr1_54419878_54420105
chr1	54424372	54424885	chr1_54424372_54424885
chr1	54440783	54441563	chr1_54440783_54441563
chr1	54521645	54521917	chr1_54521645_54521917
chr1	54541555	54542183	chr1_54541555_54542183
chr1	54628502	54628793	chr1_54628502_54628793
chr1	54629954	54630132	chr1_54629954_54630132
chr1	54645577	54645916	chr1_54645577_54645916
chr1	54656825	54658079	chr1_54656825_54658079
chr1	54662945	54663253	chr1_54662945_54663253
chr1	54666548	54667269	chr1_54666548_54667269
chr1	54732256	54732546	chr1_54732256_54732546
chr1	54755020	54755296	chr1_54755020_54755296
chr1	54764654	54764898	chr1_54764654_54764898
chr1	54778985	54779174	chr1_54778985_54779174
chr1	54790552	54790692	chr1_54790552_54790692
chr1	54816614	54817019	chr1_54816614_54817019
chr1	54977190	54977343	chr1_54977190_54977343
chr1	55069484	55070007	chr1_55069484_55070007
chr1	55088352	55088522	chr1_55088352_55088522
chr1	55117640	55117854	chr1_55117640_55117854
chr1	55155925	55156143	chr1_55155925_55156143
chr1	55175082	55175629	chr1_55175082_55175629
chr1	55317087	55317399	chr1_55317087_55317399
chr1	55352975	55353158	chr1_55352975_55353158
chr1	55539355	55539782	chr1_55539355_55539782
chr1	55548462	55549194	chr1_55548462_55549194
chr1	55554480	55554829	chr1_55554480_55554829
chr1	55643393	55643604	chr1_55643393_55643604
chr1	55740259	55740763	chr1_55740259_55740763
chr1	55757704	55757967	chr1_55757704_55757967
chr1	55763928	55764086	chr1_55763928_55764086
chr1	55802867	55803148	chr1_55802867_55803148
chr1	55843556	55843727	chr1_55843556_55843727
chr1	55845346	55845884	chr1_55845346_55845884
chr1	55858393	55858548	chr1_55858393_55858548
chr1	55893728	55894076	chr1_55893728_55894076
chr1	55905647	55905922	chr1_55905647_55905922
chr1	55909196	55909769	chr1_55909196_55909769
chr1	55943315	55943470	chr1_55943315_55943470
chr1	56004555	56004918	chr1_56004555_56004918
chr1	56017109	56017728	chr1_56017109_56017728
chr1	56077139	56077282	chr1_56077139_56077282
chr1	56099751	56099901	chr1_56099751_56099901
chr1	56155584	56156425	chr1_56155584_56156425
chr1	56193688	56194035	chr1_56193688_56194035
chr1	56222614	56222891	chr1_56222614_56222891
chr1	56271731	56272042	chr1_56271731_56272042
chr1	56276482	56276893	chr1_56276482_56276893
chr1	56399981	56400126	chr1_56399981_56400126
chr1	56409558	56410046	chr1_56409558_56410046
chr1	56436986	56437374	chr1_56436986_56437374
chr1	56498636	56498786	chr1_56498636_56498786
chr1	56521614	56522066	chr1_56521614_56522066
chr1	56603003	56603360	chr1_56603003_56603360
chr1	56624465	56624780	chr1_56624465_56624780
chr1	56683941	56684558	chr1_56683941_56684558
chr1	56807912	56808257	chr1_56807912_56808257
chr1	56872076	56872803	chr1_56872076_56872803
chr1	56990654	56991137	chr1_56990654_56991137
chr1	57017474	57017712	chr1_57017474_57017712
chr1	57048550	57048718	chr1_57048550_57048718
chr1	57065920	57066182	chr1_57065920_57066182
chr1	57105666	57105894	chr1_57105666_57105894
chr1	57114591	57114797	chr1_57114591_57114797
chr1	57152554	57152736	chr1_57152554_57152736
chr1	57270377	57270598	chr1_57270377_57270598
chr1	57316752	57316939	chr1_57316752_57316939
chr1	57322278	57322545	chr1_57322278_57322545
chr1	57389556	57389855	chr1_57389556_57389855
chr1	57400488	57400704	chr1_57400488_57400704
chr1	57416151	57416652	chr1_57416151_57416652
chr1	57442693	57442890	chr1_57442693_57442890
chr1	57447976	57448524	chr1_57447976_57448524
chr1	57451027	57451327	chr1_57451027_57451327
chr1	57480632	57480953	chr1_57480632_57480953
chr1	57502642	57502906	chr1_57502642_57502906
chr1	57527141	57527592	chr1_57527141_57527592
chr1	57541893	57542421	chr1_57541893_57542421
chr1	57600697	57601404	chr1_57600697_57601404
chr1	57677145	57677473	chr1_57677145_57677473
chr1	57688085	57688293	chr1_57688085_57688293
chr1	57700153	57700915	chr1_57700153_57700915
chr1	57709837	57710786	chr1_57709837_57710786
chr1	57730517	57730649	chr1_57730517_57730649
chr1	57771338	57772420	chr1_57771338_57772420
chr1	57772429	57772926	chr1_57772429_57772926
chr1	57775213	57775625	chr1_57775213_57775625
chr1	57838071	57838245	chr1_57838071_57838245
chr1	57900602	57901110	chr1_57900602_57901110
chr1	57901884	57902643	chr1_57901884_57902643
chr1	57918775	57919301	chr1_57918775_57919301
chr1	57926349	57926570	chr1_57926349_57926570
chr1	57976718	57977696	chr1_57976718_57977696
chr1	57985493	57985741	chr1_57985493_57985741
chr1	58006008	58006330	chr1_58006008_58006330
chr1	58010917	58011080	chr1_58010917_58011080
chr1	58118550	58119081	chr1_58118550_58119081
chr1	58142159	58142380	chr1_58142159_58142380
chr1	58162388	58162975	chr1_58162388_58162975
chr1	58185154	58185309	chr1_58185154_58185309
chr1	58250017	58250237	chr1_58250017_58250237
chr1	58252531	58252772	chr1_58252531_58252772
chr1	58327919	58328211	chr1_58327919_58328211
chr1	58464338	58465268	chr1_58464338_58465268
chr1	58465623	58467298	chr1_58465623_58467298
chr1	58467424	58467798	chr1_58467424_58467798
chr1	58574550	58575159	chr1_58574550_58575159
chr1	58575652	58576242	chr1_58575652_58576242
chr1	58619319	58619631	chr1_58619319_58619631
chr1	58635847	58636426	chr1_58635847_58636426
chr1	58734230	58734887	chr1_58734230_58734887
chr1	58942596	58942788	chr1_58942596_58942788
chr1	59064176	59064457	chr1_59064176_59064457
chr1	59066072	59066313	chr1_59066072_59066313
chr1	59094603	59094891	chr1_59094603_59094891
chr1	59124956	59125099	chr1_59124956_59125099
chr1	59250096	59250373	chr1_59250096_59250373
chr1	59343382	59343577	chr1_59343382_59343577
chr1	59383904	59384186	chr1_59383904_59384186
chr1	59606038	59606255	chr1_59606038_59606255
chr1	59647617	59647786	chr1_59647617_59647786
chr1	59679998	59680751	chr1_59679998_59680751
chr1	59708032	59708292	chr1_59708032_59708292
chr1	59708308	59708509	chr1_59708308_59708509
chr1	59754410	59755050	chr1_59754410_59755050
chr1	59821322	59821729	chr1_59821322_59821729
chr1	59938472	59938709	chr1_59938472_59938709
chr1	59949782	59950199	chr1_59949782_59950199
chr1	60005337	60005659	chr1_60005337_60005659
chr1	60104388	60104652	chr1_60104388_60104652
chr1	60111477	60112250	chr1_60111477_60112250
chr1	60143355	60144352	chr1_60143355_60144352
chr1	60194296	60194513	chr1_60194296_60194513
chr1	60253653	60253942	chr1_60253653_60253942
chr1	60329285	60329478	chr1_60329285_60329478
chr1	60376552	60377419	chr1_60376552_60377419
chr1	60386012	60386320	chr1_60386012_60386320
chr1	60673113	60673345	chr1_60673113_60673345
chr1	60693798	60694041	chr1_60693798_60694041
chr1	60706543	60706832	chr1_60706543_60706832
chr1	60835465	60836209	chr1_60835465_60836209
chr1	60875453	60875947	chr1_60875453_60875947
chr1	60925226	60925669	chr1_60925226_60925669
chr1	61036072	61036236	chr1_61036072_61036236
chr1	61082281	61082479	chr1_61082281_61082479
chr1	61116898	61117173	chr1_61116898_61117173
chr1	61128240	61128882	chr1_61128240_61128882
chr1	61176289	61176605	chr1_61176289_61176605
chr1	61187063	61187256	chr1_61187063_61187256
chr1	61187389	61187640	chr1_61187389_61187640
chr1	61227028	61227463	chr1_61227028_61227463
chr1	61247805	61247973	chr1_61247805_61247973
chr1	61363067	61363317	chr1_61363067_61363317
chr1	61388633	61389052	chr1_61388633_61389052
chr1	61464017	61464446	chr1_61464017_61464446
chr1	61468425	61468757	chr1_61468425_61468757
chr1	61517186	61517968	chr1_61517186_61517968
chr1	61518799	61518998	chr1_61518799_61518998
chr1	61569644	61570121	chr1_61569644_61570121
chr1	61587842	61588208	chr1_61587842_61588208
chr1	61625692	61626059	chr1_61625692_61626059
chr1	61688517	61688724	chr1_61688517_61688724
chr1	61717118	61717790	chr1_61717118_61717790
chr1	61817886	61818071	chr1_61817886_61818071
chr1	61932849	61933039	chr1_61932849_61933039
chr1	61947790	61947980	chr1_61947790_61947980
chr1	61986124	61986848	chr1_61986124_61986848
chr1	62013652	62013964	chr1_62013652_62013964
chr1	62036798	62037095	chr1_62036798_62037095
chr1	62063722	62063871	chr1_62063722_62063871
chr1	62195586	62195839	chr1_62195586_62195839
chr1	62286138	62286306	chr1_62286138_62286306
chr1	62341314	62342446	chr1_62341314_62342446
chr1	62362653	62362892	chr1_62362653_62362892
chr1	62371927	62372727	chr1_62371927_62372727
chr1	62454289	62454571	chr1_62454289_62454571
chr1	62613056	62613824	chr1_62613056_62613824
chr1	62878755	62879192	chr1_62878755_62879192
chr1	62952535	62952879	chr1_62952535_62952879
chr1	63010824	63011312	chr1_63010824_63011312
chr1	63073301	63073741	chr1_63073301_63073741
chr1	63104300	63105039	chr1_63104300_63105039
chr1	63105106	63105259	chr1_63105106_63105259
chr1	63179890	63180092	chr1_63179890_63180092
chr1	63265866	63266115	chr1_63265866_63266115
chr1	63302411	63302589	chr1_63302411_63302589
chr1	63302653	63303294	chr1_63302653_63303294
chr1	63303418	63303552	chr1_63303418_63303552
chr1	63319332	63321132	chr1_63319332_63321132
chr1	63326885	63327124	chr1_63326885_63327124
chr1	63461423	63462558	chr1_63461423_63462558
chr1	63488610	63489418	chr1_63488610_63489418
chr1	63520211	63520441	chr1_63520211_63520441
chr1	63531354	63531884	chr1_63531354_63531884
chr1	63613899	63614056	chr1_63613899_63614056
chr1	63631438	63631975	chr1_63631438_63631975
chr1	63832554	63832972	chr1_63832554_63832972
chr1	63852634	63852832	chr1_63852634_63852832
chr1	63855343	63855598	chr1_63855343_63855598
chr1	63860280	63860439	chr1_63860280_63860439
chr1	64234494	64234925	chr1_64234494_64234925
chr1	64261182	64261329	chr1_64261182_64261329
chr1	64427577	64428447	chr1_64427577_64428447
chr1	64451579	64451955	chr1_64451579_64451955
chr1	64503397	64503558	chr1_64503397_64503558
chr1	64508015	64508420	chr1_64508015_64508420
chr1	64571220	64571482	chr1_64571220_64571482
chr1	64661074	64661352	chr1_64661074_64661352
chr1	64746538	64747076	chr1_64746538_64747076
chr1	64915369	64915568	chr1_64915369_64915568
chr1	64927125	64927465	chr1_64927125_64927465
chr1	64943082	64943668	chr1_64943082_64943668
chr1	65069316	65069630	chr1_65069316_65069630
chr1	65074588	65075391	chr1_65074588_65075391
chr1	65084029	65084891	chr1_65084029_65084891
chr1	65095512	65096010	chr1_65095512_65096010
chr1	65114476	65114709	chr1_65114476_65114709
chr1	65122133	65122386	chr1_65122133_65122386
chr1	65208937	65209086	chr1_65208937_65209086
chr1	65216187	65216726	chr1_65216187_65216726
chr1	65245405	65245665	chr1_65245405_65245665
chr1	65278473	65278784	chr1_65278473_65278784
chr1	65321787	65322003	chr1_65321787_65322003
chr1	65328193	65328333	chr1_65328193_65328333
chr1	65376161	65377237	chr1_65376161_65377237
chr1	65398930	65399516	chr1_65398930_65399516
chr1	65399568	65400016	chr1_65399568_65400016
chr1	65423070	65423199	chr1_65423070_65423199
chr1	65436700	65436852	chr1_65436700_65436852
chr1	65440495	65441038	chr1_65440495_65441038
chr1	65485685	65486029	chr1_65485685_65486029
chr1	65581342	65581660	chr1_65581342_65581660
chr1	65582138	65582938	chr1_65582138_65582938
chr1	65611090	65612432	chr1_65611090_65612432
chr1	65701170	65701628	chr1_65701170_65701628
chr1	65712613	65713103	chr1_65712613_65713103
chr1	65728598	65728970	chr1_65728598_65728970
chr1	65739895	65740352	chr1_65739895_65740352
chr1	65780327	65780716	chr1_65780327_65780716
chr1	65840678	65841107	chr1_65840678_65841107
chr1	65841235	65842289	chr1_65841235_65842289
chr1	65864919	65865747	chr1_65864919_65865747
chr1	65973136	65973503	chr1_65973136_65973503
chr1	65980026	65980207	chr1_65980026_65980207
chr1	66032974	66033155	chr1_66032974_66033155
chr1	66033252	66033563	chr1_66033252_66033563
chr1	66151929	66152105	chr1_66151929_66152105
chr1	66167164	66168409	chr1_66167164_66168409
chr1	66297347	66297822	chr1_66297347_66297822
chr1	66303894	66304282	chr1_66303894_66304282
chr1	66367412	66367716	chr1_66367412_66367716
chr1	66368281	66369114	chr1_66368281_66369114
chr1	66370232	66370461	chr1_66370232_66370461
chr1	66427005	66427520	chr1_66427005_66427520
chr1	66433242	66433864	chr1_66433242_66433864
chr1	66435194	66435548	chr1_66435194_66435548
chr1	66435608	66435820	chr1_66435608_66435820
chr1	66489550	66489987	chr1_66489550_66489987
chr1	66490792	66491045	chr1_66490792_66491045
chr1	66724012	66725220	chr1_66724012_66725220
chr1	66739206	66739668	chr1_66739206_66739668
chr1	66952841	66952981	chr1_66952841_66952981
chr1	66958789	66959108	chr1_66958789_66959108
chr1	66980745	66980922	chr1_66980745_66980922
chr1	67007168	67007860	chr1_67007168_67007860
chr1	67043356	67043790	chr1_67043356_67043790
chr1	67075848	67076112	chr1_67075848_67076112
chr1	67158352	67158554	chr1_67158352_67158554
chr1	67171510	67171731	chr1_67171510_67171731
chr1	67176152	67176380	chr1_67176152_67176380
chr1	67189291	67189691	chr1_67189291_67189691
chr1	67225194	67225594	chr1_67225194_67225594
chr1	67227693	67228494	chr1_67227693_67228494
chr1	67248566	67248950	chr1_67248566_67248950
chr1	67266196	67266326	chr1_67266196_67266326
chr1	67353576	67354483	chr1_67353576_67354483
chr1	67368692	67368876	chr1_67368692_67368876
chr1	67476127	67476992	chr1_67476127_67476992
chr1	67510695	67510851	chr1_67510695_67510851
chr1	67524714	67524930	chr1_67524714_67524930
chr1	67543334	67543563	chr1_67543334_67543563
chr1	67565059	67565279	chr1_67565059_67565279
chr1	67568022	67568327	chr1_67568022_67568327
chr1	67580422	67580582	chr1_67580422_67580582
chr1	67686873	67687568	chr1_67686873_67687568
chr1	67696737	67697036	chr1_67696737_67697036
chr1	67767718	67768902	chr1_67767718_67768902
chr1	67841378	67842086	chr1_67841378_67842086
chr1	67866856	67867160	chr1_67866856_67867160
chr1	67972085	67972498	chr1_67972085_67972498
chr1	67973217	67973782	chr1_67973217_67973782
chr1	67975537	67976024	chr1_67975537_67976024
chr1	67980077	67981361	chr1_67980077_67981361
chr1	67981376	67983061	chr1_67981376_67983061
chr1	68006721	68007005	chr1_68006721_68007005
chr1	68027732	68028212	chr1_68027732_68028212
chr1	68071094	68071391	chr1_68071094_68071391
chr1	68122260	68122612	chr1_68122260_68122612
chr1	68136308	68136670	chr1_68136308_68136670
chr1	68153032	68153452	chr1_68153032_68153452
chr1	68189119	68190051	chr1_68189119_68190051
chr1	68225079	68225553	chr1_68225079_68225553
chr1	68234765	68235096	chr1_68234765_68235096
chr1	68351021	68351456	chr1_68351021_68351456
chr1	68429594	68429747	chr1_68429594_68429747
chr1	68447711	68448168	chr1_68447711_68448168
chr1	68527643	68528258	chr1_68527643_68528258
chr1	68551318	68551803	chr1_68551318_68551803
chr1	68636628	68637135	chr1_68636628_68637135
chr1	68683617	68684330	chr1_68683617_68684330
chr1	68734379	68734633	chr1_68734379_68734633
chr1	68798884	68799886	chr1_68798884_68799886
chr1	68850062	68850253	chr1_68850062_68850253
chr1	68867615	68867873	chr1_68867615_68867873
chr1	68906140	68906295	chr1_68906140_68906295
chr1	68911940	68912213	chr1_68911940_68912213
chr1	68982916	68983347	chr1_68982916_68983347
chr1	69056711	69057077	chr1_69056711_69057077
chr1	69069897	69070111	chr1_69069897_69070111
chr1	69111669	69112245	chr1_69111669_69112245
chr1	69135173	69135332	chr1_69135173_69135332
chr1	69164835	69165055	chr1_69164835_69165055
chr1	69169156	69169357	chr1_69169156_69169357
chr1	69169445	69169659	chr1_69169445_69169659
chr1	69267653	69268427	chr1_69267653_69268427
chr1	69286027	69286448	chr1_69286027_69286448
chr1	69379572	69379830	chr1_69379572_69379830
chr1	69416621	69417092	chr1_69416621_69417092
chr1	69434844	69435017	chr1_69434844_69435017
chr1	69452298	69452555	chr1_69452298_69452555
chr1	69474355	69474555	chr1_69474355_69474555
chr1	69497152	69497700	chr1_69497152_69497700
chr1	69571544	69571861	chr1_69571544_69571861
chr1	69585276	69585560	chr1_69585276_69585560
chr1	69600706	69600973	chr1_69600706_69600973
chr1	69650699	69650866	chr1_69650699_69650866
chr1	69735563	69735846	chr1_69735563_69735846
chr1	69770229	69771589	chr1_69770229_69771589
chr1	69774680	69774867	chr1_69774680_69774867
chr1	69793179	69794148	chr1_69793179_69794148
chr1	69804382	69804644	chr1_69804382_69804644
chr1	69805909	69806057	chr1_69805909_69806057
chr1	69806077	69806454	chr1_69806077_69806454
chr1	69886506	69886647	chr1_69886506_69886647
chr1	69909800	69910022	chr1_69909800_69910022
chr1	69931879	69932347	chr1_69931879_69932347
chr1	69996829	69997015	chr1_69996829_69997015
chr1	69997153	69997333	chr1_69997153_69997333
chr1	70015587	70015844	chr1_70015587_70015844
chr1	70053236	70053634	chr1_70053236_70053634
chr1	70067367	70067774	chr1_70067367_70067774
chr1	70079421	70079828	chr1_70079421_70079828
chr1	70146667	70147228	chr1_70146667_70147228
chr1	70169758	70169993	chr1_70169758_70169993
chr1	70174337	70175090	chr1_70174337_70175090
chr1	70189051	70190383	chr1_70189051_70190383
chr1	70199276	70200053	chr1_70199276_70200053
chr1	70238192	70238563	chr1_70238192_70238563
chr1	70250193	70250480	chr1_70250193_70250480
chr1	70271281	70271465	chr1_70271281_70271465
chr1	70311617	70311968	chr1_70311617_70311968
chr1	70312667	70312855	chr1_70312667_70312855
chr1	70349889	70350107	chr1_70349889_70350107
chr1	70367052	70368065	chr1_70367052_70368065
chr1	70374679	70374901	chr1_70374679_70374901
chr1	70404691	70404916	chr1_70404691_70404916
chr1	70413344	70413758	chr1_70413344_70413758
chr1	70426114	70426562	chr1_70426114_70426562
chr1	70426768	70426915	chr1_70426768_70426915
chr1	70521579	70521736	chr1_70521579_70521736
chr1	70545600	70545865	chr1_70545600_70545865
chr1	70668427	70668814	chr1_70668427_70668814
chr1	70671222	70672129	chr1_70671222_70672129
chr1	70741016	70741218	chr1_70741016_70741218
chr1	70833875	70834120	chr1_70833875_70834120
chr1	70868146	70868400	chr1_70868146_70868400
chr1	70875927	70876088	chr1_70875927_70876088
chr1	70879982	70880264	chr1_70879982_70880264
chr1	70898354	70898897	chr1_70898354_70898897
chr1	70948898	70949340	chr1_70948898_70949340
chr1	70957094	70958061	chr1_70957094_70958061
chr1	71032897	71033645	chr1_71032897_71033645
chr1	71064719	71065763	chr1_71064719_71065763
chr1	71110577	71110877	chr1_71110577_71110877
chr1	71116699	71116990	chr1_71116699_71116990
chr1	71132278	71133274	chr1_71132278_71133274
chr1	71165340	71166030	chr1_71165340_71166030
chr1	71179149	71179320	chr1_71179149_71179320
chr1	71296850	71297238	chr1_71296850_71297238
chr1	71334722	71334952	chr1_71334722_71334952
chr1	71336184	71336656	chr1_71336184_71336656
chr1	71336729	71337083	chr1_71336729_71337083
chr1	71403356	71403528	chr1_71403356_71403528
chr1	71408376	71408522	chr1_71408376_71408522
chr1	71448837	71448972	chr1_71448837_71448972
chr1	71476091	71476717	chr1_71476091_71476717
chr1	71552231	71552412	chr1_71552231_71552412
chr1	71562567	71562830	chr1_71562567_71562830
chr1	71697374	71697628	chr1_71697374_71697628
chr1	71819000	71819238	chr1_71819000_71819238
chr1	71824624	71825108	chr1_71824624_71825108
chr1	71840643	71840811	chr1_71840643_71840811
chr1	71850802	71851282	chr1_71850802_71851282
chr1	71927200	71927383	chr1_71927200_71927383
chr1	71961867	71962634	chr1_71961867_71962634
chr1	71965709	71965939	chr1_71965709_71965939
chr1	72071639	72072181	chr1_72071639_72072181
chr1	72117118	72117427	chr1_72117118_72117427
chr1	72193492	72193717	chr1_72193492_72193717
chr1	72202044	72202318	chr1_72202044_72202318
chr1	72247834	72248099	chr1_72247834_72248099
chr1	72263454	72263704	chr1_72263454_72263704
chr1	72311213	72311361	chr1_72311213_72311361
chr1	72348457	72348660	chr1_72348457_72348660
chr1	72359447	72360607	chr1_72359447_72360607
chr1	72441946	72442222	chr1_72441946_72442222
chr1	72448040	72448587	chr1_72448040_72448587
chr1	72449429	72450060	chr1_72449429_72450060
chr1	72453072	72453520	chr1_72453072_72453520
chr1	72489396	72489547	chr1_72489396_72489547
chr1	72501400	72501772	chr1_72501400_72501772
chr1	72611320	72611467	chr1_72611320_72611467
chr1	72763280	72763987	chr1_72763280_72763987
chr1	72850751	72850904	chr1_72850751_72850904
chr1	72918425	72918861	chr1_72918425_72918861
chr1	72918924	72919641	chr1_72918924_72919641
chr1	73082143	73082275	chr1_73082143_73082275
chr1	73106878	73107176	chr1_73106878_73107176
chr1	73197588	73197897	chr1_73197588_73197897
chr1	73217307	73217508	chr1_73217307_73217508
chr1	73254054	73254409	chr1_73254054_73254409
chr1	73384048	73384354	chr1_73384048_73384354
chr1	73388535	73388917	chr1_73388535_73388917
chr1	73484502	73484668	chr1_73484502_73484668
chr1	73484862	73485204	chr1_73484862_73485204
chr1	73556147	73556466	chr1_73556147_73556466
chr1	73617407	73617855	chr1_73617407_73617855
chr1	73624213	73624738	chr1_73624213_73624738
chr1	73637997	73638728	chr1_73637997_73638728
chr1	73689325	73689653	chr1_73689325_73689653
chr1	73709867	73710694	chr1_73709867_73710694
chr1	73728477	73728727	chr1_73728477_73728727
chr1	73762355	73762542	chr1_73762355_73762542
chr1	73768387	73768653	chr1_73768387_73768653
chr1	73783773	73784078	chr1_73783773_73784078
chr1	73861570	73862176	chr1_73861570_73862176
chr1	73871122	73871288	chr1_73871122_73871288
chr1	73990471	73990674	chr1_73990471_73990674
chr1	74114863	74115286	chr1_74114863_74115286
chr1	74138923	74139141	chr1_74138923_74139141
chr1	74315515	74315871	chr1_74315515_74315871
chr1	74405191	74405405	chr1_74405191_74405405
chr1	74581782	74582395	chr1_74581782_74582395
chr1	74629200	74629457	chr1_74629200_74629457
chr1	74674601	74674955	chr1_74674601_74674955
chr1	74690269	74690897	chr1_74690269_74690897
chr1	74744046	74744242	chr1_74744046_74744242
chr1	74770459	74770702	chr1_74770459_74770702
chr1	74819523	74820059	chr1_74819523_74820059
chr1	74923276	74924278	chr1_74923276_74924278
chr1	74927468	74927699	chr1_74927468_74927699
chr1	74931359	74931812	chr1_74931359_74931812
chr1	74979428	74979588	chr1_74979428_74979588
chr1	74988191	74988643	chr1_74988191_74988643
chr1	74995313	74997041	chr1_74995313_74997041
chr1	75020214	75020370	chr1_75020214_75020370
chr1	75038054	75038885	chr1_75038054_75038885
chr1	75083315	75083526	chr1_75083315_75083526
chr1	75201177	75201656	chr1_75201177_75201656
chr1	75575996	75576507	chr1_75575996_75576507
chr1	75590678	75590841	chr1_75590678_75590841
chr1	75750823	75751123	chr1_75750823_75751123
chr1	75779752	75780059	chr1_75779752_75780059
chr1	75794548	75794757	chr1_75794548_75794757
chr1	75801122	75801336	chr1_75801122_75801336
chr1	75960952	75961233	chr1_75960952_75961233
chr1	75993617	75994068	chr1_75993617_75994068
chr1	76057715	76057865	chr1_76057715_76057865
chr1	76059281	76059449	chr1_76059281_76059449
chr1	76178670	76179201	chr1_76178670_76179201
chr1	76213673	76213899	chr1_76213673_76213899
chr1	76254105	76254786	chr1_76254105_76254786
chr1	76279937	76280134	chr1_76279937_76280134
chr1	76340337	76340501	chr1_76340337_76340501
chr1	76486366	76486688	chr1_76486366_76486688
chr1	76486902	76487054	chr1_76486902_76487054
chr1	76487342	76487960	chr1_76487342_76487960
chr1	76533050	76533284	chr1_76533050_76533284
chr1	76572149	76572303	chr1_76572149_76572303
chr1	76616296	76616612	chr1_76616296_76616612
chr1	76687481	76687923	chr1_76687481_76687923
chr1	76694337	76694639	chr1_76694337_76694639
chr1	76714342	76714722	chr1_76714342_76714722
chr1	76900569	76900903	chr1_76900569_76900903
chr1	77125043	77125221	chr1_77125043_77125221
chr1	77135740	77135959	chr1_77135740_77135959
chr1	77251098	77251382	chr1_77251098_77251382
chr1	77251794	77251998	chr1_77251794_77251998
chr1	77312022	77312225	chr1_77312022_77312225
chr1	77398061	77398359	chr1_77398061_77398359
chr1	77535062	77535497	chr1_77535062_77535497
chr1	77558465	77558843	chr1_77558465_77558843
chr1	77581995	77582571	chr1_77581995_77582571
chr1	77585936	77586190	chr1_77585936_77586190
chr1	77597206	77597565	chr1_77597206_77597565
chr1	77614928	77615103	chr1_77614928_77615103
chr1	77637646	77638271	chr1_77637646_77638271
chr1	77657431	77658840	chr1_77657431_77658840
chr1	77709664	77709979	chr1_77709664_77709979
chr1	77718046	77718458	chr1_77718046_77718458
chr1	77750975	77751359	chr1_77750975_77751359
chr1	77868259	77868469	chr1_77868259_77868469
chr1	77892962	77893360	chr1_77892962_77893360
chr1	77924349	77924876	chr1_77924349_77924876
chr1	77968854	77969361	chr1_77968854_77969361
chr1	78082843	78083351	chr1_78082843_78083351
chr1	78103313	78103514	chr1_78103313_78103514
chr1	78106973	78107421	chr1_78106973_78107421
chr1	78125865	78126240	chr1_78125865_78126240
chr1	78264249	78264462	chr1_78264249_78264462
chr1	78275707	78275994	chr1_78275707_78275994
chr1	78278587	78278776	chr1_78278587_78278776
chr1	78298963	78299111	chr1_78298963_78299111
chr1	78302552	78302719	chr1_78302552_78302719
chr1	78382331	78382781	chr1_78382331_78382781
chr1	78451104	78451864	chr1_78451104_78451864
chr1	78479666	78480323	chr1_78479666_78480323
chr1	78545604	78545901	chr1_78545604_78545901
chr1	78577630	78577821	chr1_78577630_78577821
chr1	78603062	78603221	chr1_78603062_78603221
chr1	78683252	78683903	chr1_78683252_78683903
chr1	78723578	78723935	chr1_78723578_78723935
chr1	78747124	78747968	chr1_78747124_78747968
chr1	78757532	78758291	chr1_78757532_78758291
chr1	78778415	78778843	chr1_78778415_78778843
chr1	78842841	78843442	chr1_78842841_78843442
chr1	78892365	78892920	chr1_78892365_78892920
chr1	78938689	78938847	chr1_78938689_78938847
chr1	78986787	78987093	chr1_78986787_78987093
chr1	78996140	78996333	chr1_78996140_78996333
chr1	79002416	79002654	chr1_79002416_79002654
chr1	79052543	79052704	chr1_79052543_79052704
chr1	79053440	79053745	chr1_79053440_79053745
chr1	79185415	79186237	chr1_79185415_79186237
chr1	79187609	79187941	chr1_79187609_79187941
chr1	79226532	79226741	chr1_79226532_79226741
chr1	79243541	79243765	chr1_79243541_79243765
chr1	79300106	79300295	chr1_79300106_79300295
chr1	79351662	79351910	chr1_79351662_79351910
chr1	79359314	79360435	chr1_79359314_79360435
chr1	79371463	79371696	chr1_79371463_79371696
chr1	79376412	79376778	chr1_79376412_79376778
chr1	79376925	79377664	chr1_79376925_79377664
chr1	79387798	79388329	chr1_79387798_79388329
chr1	79397890	79398472	chr1_79397890_79398472
chr1	79402915	79403390	chr1_79402915_79403390
chr1	79412160	79412388	chr1_79412160_79412388
chr1	79510126	79510396	chr1_79510126_79510396
chr1	79521252	79522233	chr1_79521252_79522233
chr1	79583763	79584196	chr1_79583763_79584196
chr1	79607622	79608268	chr1_79607622_79608268
chr1	79636641	79637052	chr1_79636641_79637052
chr1	79687901	79688277	chr1_79687901_79688277
chr1	79692372	79692684	chr1_79692372_79692684
chr1	79692915	79693278	chr1_79692915_79693278
chr1	79701143	79701822	chr1_79701143_79701822
chr1	79745358	79745553	chr1_79745358_79745553
chr1	79765737	79767172	chr1_79765737_79767172
chr1	79778609	79779417	chr1_79778609_79779417
chr1	79799607	79799912	chr1_79799607_79799912
chr1	79858036	79858227	chr1_79858036_79858227
chr1	79924578	79924817	chr1_79924578_79924817
chr1	80027844	80027993	chr1_80027844_80027993
chr1	80145356	80145872	chr1_80145356_80145872
chr1	80147092	80147804	chr1_80147092_80147804
chr1	80149818	80150136	chr1_80149818_80150136
chr1	80203770	80204339	chr1_80203770_80204339
chr1	80257158	80257312	chr1_80257158_80257312
chr1	80258346	80258796	chr1_80258346_80258796
chr1	80397939	80398274	chr1_80397939_80398274
chr1	80472629	80473059	chr1_80472629_80473059
chr1	80518947	80519471	chr1_80518947_80519471
chr1	80537893	80538384	chr1_80537893_80538384
chr1	80540824	80541496	chr1_80540824_80541496
chr1	80619032	80620090	chr1_80619032_80620090
chr1	80652189	80652663	chr1_80652189_80652663
chr1	80653245	80653553	chr1_80653245_80653553
chr1	80724190	80725189	chr1_80724190_80725189
chr1	80729710	80729975	chr1_80729710_80729975
chr1	80753750	80755479	chr1_80753750_80755479
chr1	80836505	80836670	chr1_80836505_80836670
chr1	80837102	80837256	chr1_80837102_80837256
chr1	80989175	80989933	chr1_80989175_80989933
chr1	81030149	81030326	chr1_81030149_81030326
chr1	81039756	81039904	chr1_81039756_81039904
chr1	81054976	81055360	chr1_81054976_81055360
chr1	81122472	81122632	chr1_81122472_81122632
chr1	81128740	81129214	chr1_81128740_81129214
chr1	81165824	81166492	chr1_81165824_81166492
chr1	81185635	81186268	chr1_81185635_81186268
chr1	81220383	81220569	chr1_81220383_81220569
chr1	81228135	81229157	chr1_81228135_81229157
chr1	81247743	81248001	chr1_81247743_81248001
chr1	81261002	81261678	chr1_81261002_81261678
chr1	81282311	81282750	chr1_81282311_81282750
chr1	81283648	81284425	chr1_81283648_81284425
chr1	81284733	81284947	chr1_81284733_81284947
chr1	81297260	81297557	chr1_81297260_81297557
chr1	81298365	81298538	chr1_81298365_81298538
chr1	81316273	81316514	chr1_81316273_81316514
chr1	81358090	81358427	chr1_81358090_81358427
chr1	81507139	81507355	chr1_81507139_81507355
chr1	81519667	81519826	chr1_81519667_81519826
chr1	81549572	81549723	chr1_81549572_81549723
chr1	81576012	81576291	chr1_81576012_81576291
chr1	81618445	81619050	chr1_81618445_81619050
chr1	81620803	81620950	chr1_81620803_81620950
chr1	81646834	81647056	chr1_81646834_81647056
chr1	81714849	81715304	chr1_81714849_81715304
chr1	81847322	81847707	chr1_81847322_81847707
chr1	81854307	81854741	chr1_81854307_81854741
chr1	81891396	81891952	chr1_81891396_81891952
chr1	81897125	81897733	chr1_81897125_81897733
chr1	81941990	81942293	chr1_81941990_81942293
chr1	82047406	82047861	chr1_82047406_82047861
chr1	82073097	82073735	chr1_82073097_82073735
chr1	82231360	82232688	chr1_82231360_82232688
chr1	82300910	82301649	chr1_82300910_82301649
chr1	82341816	82343458	chr1_82341816_82343458
chr1	82368291	82368927	chr1_82368291_82368927
chr1	82378706	82379433	chr1_82378706_82379433
chr1	82383224	82383784	chr1_82383224_82383784
chr1	82383803	82384087	chr1_82383803_82384087
chr1	82461802	82462322	chr1_82461802_82462322
chr1	82488506	82488882	chr1_82488506_82488882
chr1	82568312	82568629	chr1_82568312_82568629
chr1	82653273	82653505	chr1_82653273_82653505
chr1	82690257	82690528	chr1_82690257_82690528
chr1	82756127	82756366	chr1_82756127_82756366
chr1	82763150	82763776	chr1_82763150_82763776
chr1	82875833	82876290	chr1_82875833_82876290
chr1	82904413	82904605	chr1_82904413_82904605
chr1	82909524	82909911	chr1_82909524_82909911
chr1	82921505	82923040	chr1_82921505_82923040
chr1	82938087	82938358	chr1_82938087_82938358
chr1	82957725	82957991	chr1_82957725_82957991
chr1	82963097	82963549	chr1_82963097_82963549
chr1	82996680	82997703	chr1_82996680_82997703
chr1	83002721	83002973	chr1_83002721_83002973
chr1	83003759	83004251	chr1_83003759_83004251
chr1	83033526	83033776	chr1_83033526_83033776
chr1	83181450	83181626	chr1_83181450_83181626
chr1	83193463	83193618	chr1_83193463_83193618
chr1	83272661	83274133	chr1_83272661_83274133
chr1	83313491	83314190	chr1_83313491_83314190
chr1	83386425	83386866	chr1_83386425_83386866
chr1	83428858	83429269	chr1_83428858_83429269
chr1	83459961	83460353	chr1_83459961_83460353
chr1	83477863	83478034	chr1_83477863_83478034
chr1	83492665	83492920	chr1_83492665_83492920
chr1	83514068	83514298	chr1_83514068_83514298
chr1	83550333	83551370	chr1_83550333_83551370
chr1	83605227	83605515	chr1_83605227_83605515
chr1	83652675	83653064	chr1_83652675_83653064
chr1	83657657	83658131	chr1_83657657_83658131
chr1	83669486	83669761	chr1_83669486_83669761
chr1	83698429	83698651	chr1_83698429_83698651
chr1	83732962	83733297	chr1_83732962_83733297
chr1	83742327	83743195	chr1_83742327_83743195
chr1	83783216	83783814	chr1_83783216_83783814
chr1	83801536	83801787	chr1_83801536_83801787
chr1	83807763	83808416	chr1_83807763_83808416
chr1	83826848	83827092	chr1_83826848_83827092
chr1	83864562	83865076	chr1_83864562_83865076
chr1	83919149	83920069	chr1_83919149_83920069
chr1	83929945	83930634	chr1_83929945_83930634
chr1	83933976	83934597	chr1_83933976_83934597
chr1	83934634	83935186	chr1_83934634_83935186
chr1	83935237	83935559	chr1_83935237_83935559
chr1	83942988	83943213	chr1_83942988_83943213
chr1	83956232	83956466	chr1_83956232_83956466
chr1	83967299	83967780	chr1_83967299_83967780
chr1	84019646	84020407	chr1_84019646_84020407
chr1	84031856	84032143	chr1_84031856_84032143
chr1	84041098	84041483	chr1_84041098_84041483
chr1	84041675	84042200	chr1_84041675_84042200
chr1	84060228	84060513	chr1_84060228_84060513
chr1	84069985	84070129	chr1_84069985_84070129
chr1	84098607	84099009	chr1_84098607_84099009
chr1	84125119	84125466	chr1_84125119_84125466
chr1	84150333	84151046	chr1_84150333_84151046
chr1	84202126	84202282	chr1_84202126_84202282
chr1	84202800	84203211	chr1_84202800_84203211
chr1	84328504	84329940	chr1_84328504_84329940
chr1	84344501	84344802	chr1_84344501_84344802
chr1	84346634	84346794	chr1_84346634_84346794
chr1	84467145	84467403	chr1_84467145_84467403
chr1	84476700	84477015	chr1_84476700_84477015
chr1	84515500	84515703	chr1_84515500_84515703
chr1	84705009	84705383	chr1_84705009_84705383
chr1	84707776	84708127	chr1_84707776_84708127
chr1	84713143	84713305	chr1_84713143_84713305
chr1	84716740	84717635	chr1_84716740_84717635
chr1	84730287	84730832	chr1_84730287_84730832
chr1	84731007	84731315	chr1_84731007_84731315
[truncated: 55,050 more rows]
